# Supplementary material for: Chronic kidney disease in adults aged 18 years and older in Chile: findings from the cross-sectional Chilean National Health Surveys 2009–2010 and 2016–2017
Source: PubMed Central journal article supplement — BMJ Open. 2020 Sep 3;10(9):e037720. doi: 10.1136/bmjopen-2020-037720 (PMC7473630; doi:10.1136/bmjopen-2020-037720), 2020-09-03
Supplement: bmjopen-2020-037720.draft_revisions.pdf [file bmjopen-2020-037720.draft_revisions.pdf]

# BMJ Open

BMJ Open is committed to open peer review. As part of this commitment we make the peer review history of every article we publish publicly available.

When an article is published we post the peer reviewers' comments and the authors' responses online. We also post the versions of the paper that were used during peer review. These are the versions that the peer review comments apply to.

The versions of the paper that follow are the versions that were submitted during the peer review process. They are not the versions of record or the final published versions. They should not be cited or distributed as the published version of this manuscript.

BMJ Open is an open access journal and the full, final, typeset and author-corrected version of record of the manuscript is available on our site with no access controls, subscription charges or pay-per-view fees (<http://bmjopen.bmj.com>).

If you have any questions on BMJ Open's open peer review process please email [info.bmjopen@bmj.com](mailto:info.bmjopen@bmj.com)

# BMJ Open

## Chronic Kidney Disease in Chile: Findings from the Chilean National Health Surveys 2009-10 and 2016-17

|                               |                                                                                                                                                                                                                                                                                                                                                                           |
|-------------------------------|---------------------------------------------------------------------------------------------------------------------------------------------------------------------------------------------------------------------------------------------------------------------------------------------------------------------------------------------------------------------------|
| Journal:                      | <i>BMJ Open</i>                                                                                                                                                                                                                                                                                                                                                           |
| Manuscript ID                 | bmjopen-2020-037720                                                                                                                                                                                                                                                                                                                                                       |
| Article Type:                 | Original research                                                                                                                                                                                                                                                                                                                                                         |
| Date Submitted by the Author: | 13-Feb-2020                                                                                                                                                                                                                                                                                                                                                               |
| Complete List of Authors:     | Walbaum, Magdalena; University College London Research Department of Epidemiology and Public Health, Scholes, Shaun; UCL, Dept of Epidemiology and Public Health Pizzo, Elena; University College London, Applied Health Research Paccot, Melanie; Government of Chile Ministry of Health, Non communicable diseases Mindell, Jennifer; UCL, Epidemiology & Public Health |
| Keywords:                     | Chronic renal failure < NEPHROLOGY, EPIDEMIOLOGY, PUBLIC HEALTH, NEPHROLOGY                                                                                                                                                                                                                                                                                               |
|                               |                                                                                                                                                                                                                                                                                                                                                                           |

SCHOLARONE™  
Manuscripts

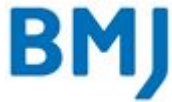

I, the Submitting Author has the right to grant and does grant on behalf of all authors of the Work (as defined in the below author licence), an exclusive licence and/or a non-exclusive licence for contributions from authors who are: i) UK Crown employees; ii) where BMJ has agreed a CC-BY licence shall apply, and/or iii) in accordance with the terms applicable for US Federal Government officers or employees acting as part of their official duties; on a worldwide, perpetual, irrevocable, royalty-free basis to BMJ Publishing Group Ltd ("BMJ") its licensees and where the relevant Journal is co-owned by BMJ to the co-owners of the Journal, to publish the Work in this journal and any other BMJ products and to exploit all rights, as set out in our [licence](#).

The Submitting Author accepts and understands that any supply made under these terms is made by BMJ to the Submitting Author unless you are acting as an employee on behalf of your employer or a postgraduate student of an affiliated institution which is paying any applicable article publishing charge ("APC") for Open Access articles. Where the Submitting Author wishes to make the Work available on an Open Access basis (and intends to pay the relevant APC), the terms of reuse of such Open Access shall be governed by a Creative Commons licence – details of these licences and which [Creative Commons](#) licence will apply to this Work are set out in our licence referred to above.

Other than as permitted in any relevant BMJ Author's Self Archiving Policies, I confirm this Work has not been accepted for publication elsewhere, is not being considered for publication elsewhere and does not duplicate material already published. I confirm all authors consent to publication of this Work and authorise the granting of this licence.

1  
2  
3  
4  
5 **Title:** Chronic Kidney Disease in Chile: Findings from the Chilean National  
6 Health Surveys 2009-10 and 2016-17  
7  
8  
9

10 **Authors:** Magdalena Walbaum,<sup>1</sup> Shaun Scholes *senior research associate*,<sup>1</sup>  
11 Elena Pizzo,<sup>1</sup> Melanie Paccot,<sup>2</sup> Jennifer S. Mindell<sup>1\*</sup>  
12  
13

14 **Running head:** Chronic Kidney Disease in Chile  
15  
16

17 <sup>1</sup> Health and Social Surveys Research Group, Research Department of  
18 Epidemiology and Public Health, University College London, 1-19 Torrington  
19 Place, London WC1E 6BT, United Kingdom  
20

21 <sup>2</sup> Department of Non-communicable diseases, Ministry of Health of Chile, Mac  
22 Iver 541, Santiago, Chile.  
23  
24  
25

26 \* Corresponding author. (e-mail: [j.mindell@ucl.ac.uk](mailto:j.mindell@ucl.ac.uk))  
27  
28  
29  
30

31 **Word count:** 3910  
32  
33  
34  
35  
36  
37  
38  
39  
40  
41  
42  
43  
44  
45  
46  
47  
48  
49  
50  
51  
52  
53  
54  
55  
56  
57  
58  
59  
60

## ABSTRACT

**Objectives:** This study estimates the prevalence of chronic kidney disease (CKD) among Chilean adults and examines its associations with sociodemographic characteristics, health behaviours, and comorbidities.

**Design:** Analysis of cross-sectional data from the two most recent large nationally representative Chilean Health Surveys (ENS) 2009-10 and 2016-17.

**Participants:** Adults aged 15+ years with serum creatine data (ENS 2009-10: n=4777; ENS 2016-17: n=5279).

**Primary and secondary outcome measures:** Reduced kidney function (CKD Stages 3a-5) based on the estimated glomerular filtration rate (eGFR  $<60$  mL/min/1.73 m<sup>2</sup>) was the primary outcome measure. Using the urine albumin-to-creatinine ratio (ACR  $\geq 30$ mg/g), increased albuminuria was ascertained among adults aged 40+ years with diabetes and/or hypertension. Both outcomes were analysed using logistic regression with results summarised using odds ratios (OR). CKD prevalence (Stages 1-5) among adults aged 40+ years was estimated using an expanded definition including participants with an eGFR of at least 60 mL/min/1.73 m<sup>2</sup> but increased albuminuria (Stages 1-2).

**Results:** Overall, 3.0% (95% CI: 2.4-3.8%) of adults in ENS 2016-17 had reduced kidney function. After full adjustment, participants with hypertension (OR 2.12; 95% CI 1.08-4.16) and those with diabetes (OR 1.66; 1.04-2.65) had significantly higher odds of reduced kidney function. In ENS 2016-17, 15.5% (13.5-17.8%) of adults aged 40+ years with diabetes and/or hypertension had increased albuminuria. Being obese versus normal-weight (OR 1.66; 1.08-2.54), and having both diabetes and hypertension versus having diabetes alone (OR 2.30; 1.34-3.95) were significantly associated with higher odds of increased albuminuria in fully-adjusted analyses. At least 15.4% of adults aged 40+ years in ENS 2016-17 had CKD (Stages 1-5) according to the expanded definition, including the 9.6% of adults at CKD Stages 1-2.

**Conclusions:** Prevention strategies and Chilean guidelines should consider the high percentage of adults at CKD Stages 1-2.

## Strengths and limitations of this study

- Data were from large nationally representative Chilean Health Surveys.
- CKD was ascertained using both eGFR and albuminuria in people 40+ years old to include all stages of the disease.
- The observational nature of this study means that only associations between variables can be assessed.
- Albuminuria data was only available from a subsample of the participants.
- Relying on single-point-in-time measurements of serum creatinine and/or albuminuria might induce some bias to the results.

For peer review only

## INTRODUCTION

Chronic kidney disease (CKD) is a leading global public health problem,<sup>1-3</sup> with a substantial burden on healthcare systems; decreased quality of life;<sup>4</sup> and poor prognosis for patients.

CKD is defined as decreased kidney function shown by glomerular filtration rate (GFR) of <60 mL/min/1.73 m<sup>2</sup> (based on measured serum creatinine values) and/or markers of kidney damage (e.g. albuminuria as indicated by increased albumin-to-creatinine ratio, that measures excess albumin excretion in the urine), of at least three months duration, regardless of the underlying cause.<sup>2,5</sup> Evidence recently published suggests that the prevalence of CKD in the general population is increasing worldwide,<sup>6</sup> in part due to population ageing and increases in the prevalence of comorbid conditions for CKD such as hypertension, diabetes mellitus and obesity.<sup>4</sup> However, other studies in high-income countries such as the UK have shown stagnation and even falling prevalence over time.<sup>7</sup>

The natural history of CKD is worsening of kidney function with time. Among the most important complications of CKD are the development of acute kidney failure, progression to end-stage kidney disease (ESKD), and onset of cardiovascular disease (CVD).<sup>1,8</sup> Whilst CKD is a precursor to ESKD, CKD patients are between five and ten times more likely to die prematurely than to progress to ESKD:<sup>2</sup> this is largely attributable to death from CVD.<sup>2,4,9</sup>

In Chile, much attention has been paid to patients with ESKD, who are in need of renal replacement treatment (RRT) such as dialysis or renal transplant, with well-documented registries of the population being treated under these regimes.<sup>10-12</sup> These registers have shown a significant increase in the use of dialysis, with more than 20,000 individuals having dialysis in 2017.<sup>10</sup> However, there is insufficient evidence in Chile on individuals at the earlier stages of the disease.

International studies suggest that given the trends and natural history of CKD,<sup>13</sup> there is a significantly higher prevalence of CKD at the earlier stages, affecting around 35% of individuals aged 70 years and over,<sup>4</sup> with a high burden for healthcare systems. Moreover, there is evidence of increases in the comorbidities for CKD in the Chilean population, such as hypertension, diabetes mellitus and obesity,<sup>14-16</sup> therefore suggesting a probable increase in the current and/or future prevalence of CKD. Although most studies in Chile to date have estimated the economic burden of RRT for ESKD, the increase in healthcare resource utilisation for the earlier stages of CKD is also significant,<sup>17</sup> namely an increase in the use of

1  
2  
3 emergency departments and outpatient visits, hospitalisation, medical expenditure and  
4 pharmacy costs,<sup>17 18</sup> with increasing costs as the disease progresses.<sup>18</sup>  
5  
6

7 The limited data on CKD prevalence and its distribution across population subgroups is an  
8 important gap in the evidence, that impedes effective decision-making in the healthcare  
9 sector. Therefore, it is important to study both the early and end-stages of CKD in the general  
10 population (i.e. not just those patients who are known to the Chilean healthcare system), in  
11 order to have accurate information to help guide strategies for prevention, diagnosis and  
12 treatment of CKD in Chile. Using data from the two most recent Chilean National Health  
13 Surveys (ENS) 2009-10 and 2016-17, this study estimates the prevalence of CKD and  
14 examines its associations with sociodemographic characteristics, health behaviours, and  
15 comorbidities.  
16  
17  
18  
19  
20  
21  
22

## 23 **METHODS**

### 24 **Study population and data collection**

25  
26 The sampling design and methods of data collection of the ENS 2009-10 and 2016-17 have  
27 been reported elsewhere, in detail in Spanish<sup>14 15</sup> and in summary in English.<sup>19</sup> Both surveys  
28 were cross-sectional study designs, with a new sample selected each time representative of  
29 the adult Chilean population at national, regional and rural/urban levels. Both were complex  
30 random samples, using multistage, stratified cluster probability sampling of households,  
31 based on the 2002 Chilean National Census.<sup>19</sup> Participants completed a face-to-face interview  
32 to provide information on self-reported health, household characteristics, socioeconomic  
33 position (SEP) including years spent in full-time education, health behaviours, and living  
34 conditions (ENS 2009-10: n=5293; ENS 2016-17: n=6233).  
35  
36  
37  
38  
39  
40  
41  
42

43 In the second stage, anthropometric measurements (including height and weight), reported  
44 information on diagnosed conditions, measured blood pressure, and biological samples  
45 (blood and urine) were collected (ENS 2009-10: n=4956; ENS 2016-17: n=5451). Valid data  
46 on the estimated glomerular filtration rate (eGFR) was available for the majority of  
47 participants involved at the second stage (ENS 2009-10: n=4777; ENS 2016-17: n=5279).  
48 Although urine samples were collected from all consenting participants, urinary analyses to  
49 determine albuminuria were performed only in the subsample of individuals classed as  
50 having diabetes mellitus (hereafter referred to as diabetes) and/or hypertension (ENS 2009-  
51 10: n=2523; ENS 2016-17: n=3907).  
52  
53  
54  
55  
56  
57  
58  
59  
60



1  
2  
3 The interview response rates from the eligible population were 85% (ENS 2009-10) and 67%  
4 (ENS 2016-17). Both ENS were approved by the Ethics Research Committee of the Faculty  
5 of Medicine at the Pontificia Universidad Católica de Chile;<sup>14 15</sup> participants gave written  
6 consent prior to data collection, measurements, and biological sampling.<sup>19</sup>  
7  
8  
9

### 10 **Definition of CKD**

11  
12 Given the cross-sectional nature of both health surveys, repeated laboratory values for the  
13 same participant were not possible, so for this study, kidney function (based on serum-  
14 creatinine based eGFR), and a marker of kidney damage (based on albuminuria), were  
15 estimated relying on single-point-in-time measurements of serum creatinine and, where  
16 available, the urine albumin-to-creatinine ratio (ACR).  
17  
18  
19  
20  
21

### 22 ***Presence of CKD using eGFR***

23  
24 Based on the serum creatinine values, the eGFR was calculated using the Chronic Kidney  
25 Disease Epidemiology Collaboration (CKD-EPI) equation, as this has shown better accuracy  
26 compared with the true GFR than the Modification of Diet in Renal Disease (MDRD)  
27 equation.<sup>20</sup> The continuous values of eGFR (mL/min/1.73 m<sup>2</sup>) were grouped into six  
28 categories based on the Kidney Disease - Improving Global Outcomes (KDIGO)<sup>5</sup> 2012  
29 classification recommendations as follows: G1:  $\geq 90$  mL/min/1.73 m<sup>2</sup> (normal or high); G2:  
30 60–89 mL/min/1.73 m<sup>2</sup> (mildly decreased); G3a: 45–59 mL/min/1.73 m<sup>2</sup> (mildly to  
31 moderately decreased); G3b: 30–44 mL/min/1.73 m<sup>2</sup> (moderately to severely decreased); G4:  
32 15–29 mL/min/1.73 m<sup>2</sup> (severely decreased), and G5:  $< 15$  mL/min/1.73 m<sup>2</sup> (kidney failure).  
33  
34 As in similar studies, individuals with eGFR  $< 60$  mL/min/1.73 m<sup>2</sup> were classed as having  
35 reduced kidney function (or CKD Stages G3a-G5).  
36  
37  
38  
39  
40  
41  
42

### 43 ***Presence of increased albuminuria using ACR***

44  
45 Based on the KDIGO classification recommendations,<sup>5</sup> three albuminuria categories were  
46 based on the urine albumin-to-creatinine ratio as follows: A1:  $< 30$  mg/g (normal to mildly  
47 increased); A2: 30-300 mg/g (moderately increased); and A3:  $> 300$  mg/g (severely  
48 increased). Increased albuminuria was defined as an ACR  $\geq 30$  mg/g. Due to orthostatic  
49 albuminuria in adolescents and young adults,<sup>21</sup> and no information on whether women were  
50 currently menstruating (which could lead to protein contamination of the urine), only  
51 participants aged 40 years and over were considered for the analysis of albuminuria.  
52  
53  
54  
55  
56  
57  
58  
59  
60

### ***Presence of CKD using eGFR and/or ACR***

The presence of CKD can also be ascertained using an expanded definition to include persons with an eGFR of at least 60 mL/min/1.73 m<sup>2</sup> but who have increased albuminuria.<sup>13</sup> Adopting this expanded definition was complicated in the present study, however, due to ACR data being available only for participants with survey-defined diabetes and/or hypertension. Hence, for the participants with no diabetes or hypertension, the presence of CKD was ascertained using eGFR data alone (CKD Stages G3a-G5: <60 mL/min/1.73 m<sup>2</sup>). For the participants with diabetes and/or hypertension, the presence of CKD was ascertained using eGFR data (CKD Stages G3a-G5: <60 mL/min/1.73 m<sup>2</sup>) and/or ACR data (increased albuminuria A2-A3: ACR ≥30 mg/g). Participants with increased albuminuria but having ‘mildly decreased’, ‘normal’, or ‘high’ kidney function (G1-G2: eGFR ≥60 mL/min/1.73 m<sup>2</sup>) are classified in the KDIGO guidelines as being in CKD Stages 1 or 2 (corresponding to A2 and A3, respectively). CKD Stages 3a to 5 correspond to the eGFR categories G3a-G5 described above. For the purposes of clarity, the KDIGO recommendations used in this study to estimate the prevalence of CKD by GFR and albuminuria categories are set out in Table 1.

**Table 1.** Presence of CKD by GFR and Albuminuria categories according to KDIGO recommendations

| Presence of CKD by GFR and Albuminuria categories: KDIGO 2012          |     |                                  |       | Albuminuria categories: Description and range |                      |                    |
|------------------------------------------------------------------------|-----|----------------------------------|-------|-----------------------------------------------|----------------------|--------------------|
|                                                                        |     |                                  |       | A1                                            | A2                   | A3                 |
|                                                                        |     |                                  |       | Normal to mildly increased                    | Moderately increased | Severely increased |
|                                                                        |     |                                  |       | <30mg/g                                       | 30-300 mg/g          | >300 mg/g          |
| GFR categories (mL/min/1.73 m <sup>2</sup> ):<br>Description and range | G1  | Normal or high                   | ≥90   |                                               |                      |                    |
|                                                                        | G2  | Mildly decreased                 | 60-89 |                                               |                      |                    |
|                                                                        | G3a | Mildly to moderately decreased   | 45-59 |                                               |                      |                    |
|                                                                        | G3b | Moderately to severely decreased | 30-44 |                                               |                      |                    |
|                                                                        | G4  | Severely decreased               | 15-29 |                                               |                      |                    |
|                                                                        | G5  | Kidney failure                   | <15   |                                               |                      |                    |

*Abbreviations:* CKD: chronic kidney disease; GFR: glomerular filtration rate; KDIGO: Kidney Disease - Improving Global Outcomes.

*Notes:* Cells in dark grey shading indicate CKD Stages G3a-G5: eGFR <60 mL/min/1.73 m<sup>2</sup>; cells in medium grey shading indicate CKD Stages 1-2: moderately to severely increased

1  
2  
3 albuminuria but 'mildly decreased', 'normal', or 'high' kidney function (eGFR  $\geq 60$   
4 mL/min/1.73 m<sup>2</sup>).  
5  
6  
7

### 8 **Demographics, socioeconomic position, health behaviours and comorbid conditions**

9  
10 Age of participants was grouped into four categories: 15–39, 40–49, 50–64, and 65 years and  
11 over. Years spent in formal education was our chosen measure of socioeconomic position  
12 (SEP), grouped as <8 years, 8–12 and >12 years.<sup>14</sup> Smoking status at time of interview was  
13 categorised as current smoker, ex-smoker and non-smoker. Participants were classed as living  
14 in an urban or rural area.<sup>15</sup> Survey-defined diabetes was classed as fasting blood glucose  
15  $\geq 126$  mg/dl [ $\geq 7.0$  mmol/L] and/or self-report of medical diagnosis. Similarly, survey-defined  
16 hypertension was classed as systolic blood pressure (SBP)  $\geq 140$  mmHg or diastolic (DBP)  
17  $\geq 90$  mmHg and/or self-report of medical diagnosis. Body mass index (BMI) was calculated  
18 as weight in kilogrammes (kg) divided by height in metres squared (m<sup>2</sup>), classifying  
19 participants into four groups: underweight (<18.5 kg/m<sup>2</sup>), normal weight (18.5–24.9 kg/m<sup>2</sup>),  
20 overweight (25–29.9 kg/m<sup>2</sup>) and obese ( $\geq 30$  kg/m<sup>2</sup>).<sup>22</sup>  
21  
22  
23  
24  
25  
26  
27  
28  
29

### 30 **Statistical analysis**

31  
32 Using descriptive analysis, we examined the characteristics of the analytical samples (means  
33 and standard deviations for continuous variables, percentages for categorical variables).  
34  
35

#### 36 ***Reduced kidney function (CKD Stages G3a-G5)***

37  
38 Using the eGFR data only, the distribution of the participants across the six eGFR categories,  
39 and the prevalence of reduced kidney function (CKD Stages G3a-G5: <60 mL/min/1.73 m<sup>2</sup>),  
40 was estimated for all adults (aged 15 years and over) in both survey years. The pattern of  
41 reduced kidney function by age was explored by calculating the mean age of the participants  
42 by eGFR category and survey year. In addition, the prevalence of reduced kidney function in  
43 each year was estimated by demographic factors, SEP, health behaviours, and comorbidities.  
44 Underweight participants were excluded from the statistical modelling due to small numbers  
45 and potential confounding with ill-health. In multivariate analysis on participants with  
46 complete data on all variables, gender- and age-adjusted logistic regression models were used  
47 to examine the relationships between the odds of reduced kidney function and demographics,  
48 SEP, health behaviours, and comorbidities. As the associations did not change over time (data  
49 not shown), the results reported in this paper are the multivariate analysis conducted on data  
50 pooled across the two survey years to increase precision (a binary indicator for survey year  
51  
52  
53  
54  
55  
56  
57  
58  
59  
60

was included in the model). Only those variables that were statistically significant ( $P<0.05$ ) in the univariate models were retained in the multivariate analyses.

### ***Increased albuminuria***

The same analytical strategies as described above were repeated to examine albuminuria. A logistic regression model was used to explore the relationships between increased albuminuria ( $ACR \geq 30$  mg/g) and demographics, SEP, health behaviours, and comorbidities. For the reasons discussed earlier, this analysis was conducted only on participants aged 40 years and over with diabetes, hypertension, or both. An additional three-category variable capturing comorbidity (diabetes only, hypertension only, diabetes and hypertension) was included in the regression model.

### ***Expanded definition of CKD using eGFR and ACR data***

In a final analysis, we examined the distribution of the population by the six eGFR and three albuminuria categories.<sup>3</sup> Using this cross-classification, the presence of CKD was estimated using the expanded definition which included participants aged 40 years and over with an eGFR of at least 60 mL/min/1.73 m<sup>2</sup> but who had increased albuminuria ( $ACR \geq 30$  mg/g, A2 and A3) and are classed as Stages 1 or 2 of CKD by the KDIGO guidelines.

All analyses were adjusted for the complex survey design of the ENS and were performed using Stata V15.1 (StataCorp, College Station, Texas, USA). Statistical significance was set at  $P<0.05$  for two-tailed tests, with no adjustment for multiple comparisons.

## **RESULTS**

The distribution of the analytical sample across the key variables is shown as supplementary data (Table S1). The key variables showed little change over time, with the exception of a decrease in current smoking and increasing obesity, diabetes, and hypertension (Table S1).

### **Reduced kidney function (CKD Stages G3a-G5)**

Table 2 shows the distribution of the participants aged 15+ years across the six eGFR categories by survey year. The prevalence of CKD based on eGFR data alone was 3.0% (95% CI: 2.4-3.8%) in ENS 2016-17. There was no statistically significant difference ( $P=0.12$ ) from the 2.3% (1.8-3.0%) prevalence in ENS 2009-10 (Table 2).

**Table 2.** Prevalence of CKD (based on eGFR values only) in the Chilean population

| <b>CKD</b> | <b>eGFR<sup>b</sup></b> | <b>Prevalence</b> |
|------------|-------------------------|-------------------|
|------------|-------------------------|-------------------|

| Stage <sup>a</sup>       | (mL/min/1.73 m <sup>2</sup> ) | ENS 2009-10 |                       | ENS 2016-17 |                       |
|--------------------------|-------------------------------|-------------|-----------------------|-------------|-----------------------|
|                          |                               | N           | % (95% CI)            | N           | % (95% CI)            |
| Stage G1 <sup>c</sup>    | ≥90                           | 3487        | 79.0 (77.0, 80.9)     | 3706        | 79.3 (77.4, 81.1)     |
| Stage G2 <sup>c</sup>    | 60-89                         | 1104        | 18.7 (16.9, 20.6)     | 1301        | 17.7 (16.0, 19.5)     |
| Stage G3a                | 45-59                         | 122         | 1.5 (1.1, 2.2)        | 176         | 2.0 (1.5, 2.6)        |
| Stage G3b                | 30-44                         | 47          | 0.5 (0.3, 0.8)        | 65          | 0.5 (0.4, 0.8)        |
| Stage G4                 | 15-29                         | 13          | 0.2 (0.1, 0.4)        | 20          | 0.4 (0.2, 0.8)        |
| Stage G5                 | <15                           | 4           | 0.1 (0.0, 0.4)        | 11          | 0.1 (0.1, 0.4)        |
| <b>CKD Stages G3a-G5</b> |                               | <b>186</b>  | <b>2.3 (1.8, 3.0)</b> | <b>272</b>  | <b>3.0 (2.4, 3.8)</b> |

<sup>a</sup> Presence of CKD (Stages G3a-G5) indicated by eGFR <60 mL/min/1.73 m<sup>2</sup> in accordance with KDIGO guidelines:<sup>5</sup> shown by cells in dark grey shading. G2: mildly decreased eGFR; G3a: mildly to moderately decreased; G3b: moderately to severely decreased; G4: severely decreased and G5: kidney failure.

<sup>b</sup> eGFR (measured in mL/min/1.73 m<sup>2</sup>) determined by CKD-EPI equation.

<sup>c</sup> Stage G1 and G2 CKD is diagnosed by the presence of raised albuminuria in the presence of normal to high eGFR. Thus, for the purposes of this table, using eGFR values only, these individuals have been classified together with the majority with no CKD.

The prevalence of reduced kidney function (eGFR <60 mL/min/1.73 m<sup>2</sup>: CKD Stages G3a-G5:) by demographics, SEP, health behaviours, and presence of comorbidities in each survey year is shown in Table 3. Patterns of association were similar in each survey. CKD prevalence, as expected, increased with age, with prevalence among those aged 65+ years reaching 15.0% (95% CI: 11.5-19.2%) and 19.1% (15.3-23.6%) in 2009-10 and 2016-17, respectively. For males and females, the prevalence of CKD (Stages G3a-G5) was higher in ENS 2016-17 than in ENS 2009-10, but the confidence intervals overlapped. CKD prevalence (Stages G3a-G5) was higher among participants with less than 8 years of formal education and was higher among those with diabetes and among those with hypertension.

**Table 3.** Prevalence of CKD (based on eGFR only) and increased albuminuria by demographics, socioeconomic position, health behaviours, and comorbidities

|               | ENS 2009-10                                    |                                                  | ENS 2016-17                                    |                                                  |
|---------------|------------------------------------------------|--------------------------------------------------|------------------------------------------------|--------------------------------------------------|
|               | CKD (based on eGFR) <sup>a</sup><br>% (95% CI) | Increased albuminuria <sup>b</sup><br>% (95% CI) | CKD (based on eGFR) <sup>a</sup><br>% (95% CI) | Increased albuminuria <sup>b</sup><br>% (95% CI) |
| All           | 2.3 (1.8, 3.0)                                 | 18.3 (15.8, 21.2)                                | 3.0 (2.4, 3.8)                                 | 15.5 (13.5, 17.8)                                |
| <b>Age</b>    |                                                |                                                  |                                                |                                                  |
| 15-39         | 0.1 (0.0, 0.3)                                 | -                                                | 0.0 (0.0, 0.1)                                 | -                                                |
| 40-49         | 0.1 (0.0, 0.2)                                 | 16.7 (12.0, 22.7)                                | 1.2 (0.4, 3.5)                                 | 9.9 (6.1, 15.7)                                  |
| 50-64         | 2.6 (1.4, 4.9)                                 | 17.0 (13.1, 21.7)                                | 1.4 (0.8, 2.4)                                 | 11.9 (9.2, 15.3)                                 |
| 65+           | 15.0 (11.5, 19.2)                              | 21.9 (17.9, 26.5)                                | 19.1 (15.3, 23.6)                              | 26.4 (22.2, 31.1)                                |
| <b>Gender</b> |                                                |                                                  |                                                |                                                  |

|                                 |                 |                   |                  |                   |
|---------------------------------|-----------------|-------------------|------------------|-------------------|
| Male                            | 1.9 (1.2, 2.9)  | 20.0 (16.0, 24.7) | 3.0 (2.2, 4.3)   | 12.3 (9.9, 15.2)  |
| Female                          | 2.7 (2.0, 3.7)  | 16.8 (13.7, 20.5) | 3.0 (2.3, 4.0)   | 18.4 (15.4, 21.9) |
| <b>Education</b>                |                 |                   |                  |                   |
| <8 years                        | 5.4 (4.0, 7.1)  | 24.1 (19.8, 29.1) | 10.8 (8.1, 14.3) | 21.3 (17.9, 25.3) |
| 8-12 years                      | 1.7 (1.1, 2.6)  | 14.7 (11.6, 18.4) | 1.7 (1.2, 2.3)   | 14.1 (11.0, 17.8) |
| >12 years                       | 1.5 (0.6, 3.4)  | 17.2 (10.8, 26.2) | 1.3 (0.6, 2.7)   | 10.1 (6.3, 15.7)  |
| <b>Residence</b>                |                 |                   |                  |                   |
| Urban                           | 2.3 (1.7, 3.0)  | 17.7 (15.0, 20.8) | 2.9 (2.2, 3.4)   | 15.3 (13.1, 17.8) |
| Rural                           | 2.8 (1.5, 4.9)  | 22.0 (15.5, 30.2) | 4.6 (3.1, 6.7)   | 17.0 (13.0, 22.0) |
| <b>Smoking</b>                  |                 |                   |                  |                   |
| Current                         | 1.1 (0.5, 2.1)  | 17.5 (13.0, 23.0) | 0.6 (0.2, 1.3)   | 14.2 (10.0, 19.8) |
| Ex-smoker                       | 3.2 (2.1, 4.9)  | 21.4 (16.1, 28.0) | 4.8 (3.4, 6.6)   | 15.5 (12.0, 19.8) |
| Never                           | 3.1 (2.1, 4.5)  | 17.2 (13.7, 21.4) | 3.9 (2.9, 5.4)   | 16.4 (13.3, 20.0) |
| <b>BMI<sup>c</sup></b>          |                 |                   |                  |                   |
| Underweight                     | 5.4 (1.3, 19.4) | 17.7 (4.5, 49.3)  | 8.7 (2.5, 26.4)  | 15.9 (3.5, 49.3)  |
| Normal                          | 1.8 (1.1, 2.8)  | 14.6 (9.7, 21.5)  | 2.3 (1.5, 3.5)   | 14.8 (10.3, 20.7) |
| Overweight                      | 2.4 (1.5, 3.8)  | 15.6 (12.2, 19.6) | 2.8 (1.8, 4.2)   | 11.1 (8.6, 14.1)  |
| Obese                           | 2.5 (1.5, 4.1)  | 22.7 (18.0, 28.1) | 3.4 (2.4, 4.8)   | 19.4 (15.8, 23.7) |
| <b>Diabetes<sup>d</sup></b>     |                 |                   |                  |                   |
| No                              | 1.7 (1.3, 2.4)  | 15.9 (13.2, 19.1) | 2.3 (1.8, 3.1)   | 11.3 (9.2, 13.8)  |
| Yes                             | 7.6 (4.4, 12.8) | 27.7 (21.2, 35.2) | 8.0 (5.7, 11.3)  | 29.2 (23.6, 35.6) |
| <b>Hypertension<sup>e</sup></b> |                 |                   |                  |                   |
| No                              | 0.9 (0.5, 1.6)  | 9.4 (6.8, 12.8)   | 0.6 (0.4, 0.9)   | 6.2 (4.3, 8.9)    |
| Yes                             | 6.3 (4.7, 8.4)  | 23.0 (19.5, 26.9) | 9.6 (7.6, 12.1)  | 22.5 (19.4, 25.9) |

<sup>a</sup>eGFR (measured in mL/min/1.73 m<sup>2</sup>) determined by CKD-EPI equation. Presence of CKD (Stages G3a-G5) considered when eGFR <60 mL/min/1.73 m<sup>2</sup>.

<sup>b</sup>Albuminuria results limited to participants aged 40+ with diabetes and/or hypertension (diagnosed or survey-detected). Albuminuria determined by the urine albumin-creatinine ratio (ACR, measured in mg/g). Increased albuminuria (A2-A3) considered when ACR ≥30mg/g.

<sup>c</sup> BMI: Body mass index. Underweight: BMI <18.5 kg/m<sup>2</sup>; normal weight: BMI 18.5-24.9 kg/m<sup>2</sup>; overweight: BMI 25-29.9 kg/m<sup>2</sup>; obese: BMI ≥30 kg/m<sup>2</sup>.

<sup>d</sup> Diabetes: Fasting blood glucose ≥126 mg/dl [≥7.0 mmol/L] and/or self-report of medical diagnosis.

<sup>e</sup> Hypertension: SBP ≥ 140 mm Hg and/or DBP ≥ 90 mm Hg, and/or self-report of medical diagnosis.

The mean age of participants across the six eGFR categories in both ENS followed an inverted U shape, as shown in Figure 1. Mean age increased as kidney function decreased until eGFR 30-45mL/min/1.73m<sup>2</sup>, but was then lower at Stages G4 (severely decreased kidney function) and G5 (kidney failure).

**Figure 1: Mean age by eGFR values in the Chilean population.**

Figure 2A shows the results from the multivariable logistic regression model of reduced kidney function based on eGFR data (Stages G3a-G5:  $<60 \text{ mL/min/1.73 m}^2$ ) among all participants aged 15+ years. After adjustment for age and gender, participants with hypertension (OR 2.12; 95% CI 1.08-4.16) and participants with diabetes (OR 1.66; 1.04-2.65) had significantly higher odds of reduced kidney function. Educational level and living in rural areas (versus urban) did not show any association with reduced kidney function in fully-adjusted analyses.

**Figure 2: Multivariable logistic regression model****Increased albuminuria in those with diabetes and/or hypertension**

Among participants aged 40+ years with measured albuminuria (and so had diabetes and/or hypertension), the prevalence of increased albuminuria ( $\text{ACR} \geq 30 \text{ mg/g}$ ) was 18.5% (16.1-21.4%) and 15.5% (13.5-17.8%) in ENS 2009-10 and ENS 2016-17, respectively (Table 3). The pattern by gender showed some difference over time, being higher for men in ENS 2009-10 (20.0% in men versus 16.8% among women) but lower in ENS 2016-17 (12.3% in men, 18.4% among women) (Table 3).

Figure 2B shows the results from the multivariable logistic regression model of increased albuminuria ( $\text{ACR} \geq 30 \text{ mg/g}$ ). After adjusting for age and gender, being obese versus normal weight (OR 1.66; 1.08-2.54) and having diabetes and hypertension versus having diabetes alone (OR 2.30; 1.34-3.95) were significantly associated with higher odds of increased albuminuria. Participants with higher levels of formal education (compared with  $<8$  years) had lower odds of increased albuminuria, although the results did not attain statistical significance (8-12y: OR 0.74; 0.54-1.03;  $>12$ y: OR 0.72; 0.44-1.19).

**Expanded definition of CKD using eGFR and ACR data**

Table 4 shows the distribution of the population by the six eGFR and three albuminuria categories among ENS participants aged 40+ years. Prevalence of CKD based on eGFR data (Stages G3a-G5:  $<60 \text{ mL/min/1.73 m}^2$ ) was 4.4% in ENS 2009-10 and 5.8% in ENS 2016-17 (shown in Table 4 by the row percentages). Prevalence of increased albuminuria based on

1  
2  
3 ACR data (ACR  $\geq$ 30mg/g) among those with diabetes and/or hypertension was 12.0% in  
4  
5 ENS 2009-10 and 11.7% in ENS 2016-17 (shown in Table 4 by the column percentages).  
6  
7  
8  
9  
10  
11  
12  
13  
14  
15  
16  
17  
18  
19  
20  
21  
22  
23  
24  
25  
26  
27  
28  
29  
30  
31  
32  
33  
34  
35  
36  
37  
38  
39  
40  
41  
42  
43  
44  
45  
46  
47  
48  
49  
50  
51  
52  
53  
54  
55  
56  
57  
58  
59  
60

For peer review only



**Table 4. Distribution of CKD by eGFR and ACR among participants aged 40+.**

| eGFR category <sup>a</sup>  | Albuminuria category <sup>b</sup> |                          |             |                          |               |                         |             |                       |             |                          |
|-----------------------------|-----------------------------------|--------------------------|-------------|--------------------------|---------------|-------------------------|-------------|-----------------------|-------------|--------------------------|
|                             | Not measured <sup>c</sup>         |                          | A1 <30mg/g  |                          | A2 30-300mg/g |                         | A3 >300mg/g |                       | Row         |                          |
|                             | N                                 | % (95% CI)               | N           | % (95% CI)               | N             | % (95% CI)              | N           | % (95% CI)            | N           | % (95% CI)               |
| <b>2009-10</b>              |                                   |                          |             |                          |               |                         |             |                       |             |                          |
| G1 [ $\geq 90$ ]            | 645                               | 25.5 (22.6, 28.6)        | 869         | 30.6 (27.7, 33.6)        | 149           | 4.7 (3.7, 6.0)          | 24          | 0.9 (0.4, 1.8)        | <b>1687</b> | <b>61.7 (58.4, 64.9)</b> |
| G2 [60-89]                  | 217                               | 8.6 (6.5, 11.1)          | 671         | 20.5 (18.1, 23.1)        | 142           | 4.1 (3.1, 5.4)          | 23          | 0.7 (0.4, 1.2)        | <b>1053</b> | <b>33.9 (30.7, 37.2)</b> |
| G3a [45-59]                 | 15                                | 0.3 (0.1, 0.8)           | 66          | 1.6 (1.0, 2.6)           | 31            | 0.9 (0.5, 1.6)          | 8           | 0.1 (0.0, 0.3)        | <b>120</b>  | <b>2.9 (2.1, 4.1)</b>    |
| G3b [30-44]                 | 8                                 | 0.2 (0.1, 0.6)           | 23          | 0.5 (0.3, 0.9)           | 11            | 0.2 (0.1, 0.5)          | 5           | 0.1 (0.0, 0.1)        | <b>47</b>   | <b>1.0 (0.6, 1.5)</b>    |
| G4 [15-29]                  | 2                                 | 0.0 (0.0, 0.1)           | 2           | 0.0 (0.0, 0.2)           | 3             | 0.1 (0.0, 0.5)          | 5           | 0.2 (0.0, 0.5)        | <b>12</b>   | <b>0.3 (0.1, 0.8)</b>    |
| G5 [ $< 15$ ]               | 2                                 | 0.2 (0.0, 0.9)           | 0           | -                        | 0             | -                       | 2           | 0.0 (0.0, 0.1)        | <b>4</b>    | <b>0.2 (0.0, 0.8)</b>    |
| <b>Column N, % (95% CI)</b> | <b>889</b>                        | <b>34.8 (31.6, 38.0)</b> | <b>1631</b> | <b>53.3 (50.0, 56.5)</b> | <b>336</b>    | <b>10.1 (8.5, 11.9)</b> | <b>67</b>   | <b>1.9 (1.3, 2.8)</b> | <b>2923</b> | <b>100 (N/A)</b>         |
| <b>2016-17</b>              |                                   |                          |             |                          |               |                         |             |                       |             |                          |
| G1 [ $\geq 90$ ]            | 484                               | 17.9 (15.5, 20.5)        | 1294        | 40.2 (37.4, 43.1)        | 167           | 4.8 (3.6, 6.4)          | 16          | 0.4 (0.2, 0.8)        | <b>1961</b> | <b>63.3 (60.3, 66.1)</b> |
| G2 [60-89]                  | 196                               | 5.2 (4.0, 6.8)           | 866         | 21.3 (19.0, 23.8)        | 164           | 3.8 (3.0, 4.8)          | 26          | 0.6 (0.4, 1.0)        | <b>1252</b> | <b>31.0 (28.3, 33.9)</b> |
| G3a [45-59]                 | 19                                | 0.4 (0.2, 0.9)           | 107         | 2.3 (1.6, 3.4)           | 36            | 0.8 (0.5, 1.4)          | 14          | 0.3 (0.1, 0.6)        | <b>176</b>  | <b>3.8 (2.9, 4.9)</b>    |
| G3b [30-44]                 | 6                                 | 0.0 (0.0, 0.1)           | 33          | 0.5 (0.3, 0.8)           | 18            | 0.4 (0.2, 0.7)          | 8           | 0.1 (0.0, 0.2)        | <b>65</b>   | <b>1.0 (0.7, 1.4)</b>    |
| G4 [15-29]                  | 2                                 | 0.1 (0.0, 0.7)           | 4           | 0.2 (0.1, 0.7)           | 8             | 0.3 (0.1, 0.8)          | 6           | 0.1 (0.0, 0.6)        | <b>20</b>   | <b>0.7 (0.4, 1.4)</b>    |
| G5 [ $< 15$ ]               | 5                                 | 0.2 (0.0, 0.8)           | 0           | -                        | 0             | -                       | 5           | 0.1 (0.0, 0.2)        | <b>10</b>   | <b>0.2 (0.1, 0.7)</b>    |
| <b>Column N, % (95% CI)</b> | <b>712</b>                        | <b>23.8 (21.1, 26.7)</b> | <b>2304</b> | <b>64.5 (61.4, 67.5)</b> | <b>393</b>    | <b>10.1 (8.6, 11.9)</b> | <b>75</b>   | <b>1.6 (1.1, 2.2)</b> | <b>3484</b> | <b>100 (N/A)</b>         |

<sup>a</sup>eGFR (measured in mL/min/1.73 m<sup>2</sup>) determined by CKD-EPI equation. G1: Normal to high eGFR; G2: Mildly decreased eGFR; G3a: mildly to moderately decreased; G3b: moderately to severely decreased; G4: severely decreased and G5: kidney failure.

<sup>b</sup>Albuminuria determined by the urine albumin-creatinine ratio (ACR, measured in mg/g). A1 (normal): <30 mg/g; A2 (moderately increased): 30-300 mg/g; A3 (severely increased): >300 mg/g.

<sup>c</sup>Albuminuria not measured as these participants had no diabetes or hypertension.

1  
2  
3 The prevalence of the expanded definition of CKD, based on combining eGFR and  
4 albuminuria criteria (CKD stages 1 to 5), was 14.8% in ENS 2009-10 and 15.4% in ENS  
5 2016-17. Based on the ENS 2009-10, those with CKD using the expanded definition  
6 comprised the 10.4% with increased albuminuria but mildly decreased, normal or high eGFR  
7 (5.6% at CKD Stage 1; 4.8% at CKD Stage 2), and the 4.4% at CKD Stages 3a-5. Similarly,  
8 based on the ENS 2016-17, those with CKD using the expanded definition comprised the  
9 9.6% with increased albuminuria but mildly decreased, normal or high eGFR (5.2% at CKD  
10 Stage 1; 4.4% at CKD Stage 2) and the 5.8% at CKD Stages 3a-5.  
11  
12  
13  
14  
15  
16  
17  
18  
19  
20  
21  
22  
23  
24  
25  
26  
27  
28  
29  
30  
31  
32  
33  
34  
35  
36  
37  
38  
39  
40  
41  
42  
43  
44  
45  
46  
47  
48  
49  
50  
51  
52  
53  
54  
55  
56  
57  
58  
59  
60

For peer review only

## DISCUSSION

In this representative sample of the Chilean population aged 15+ years, the prevalence of CKD estimated by eGFR <60 mL/min/1.73 m<sup>2</sup> (CKD Stages G3a-G5) was 3% in the most recent survey (ENS 2016-17). There is some difference from the prevalence reported in other developing and developed countries.<sup>1 2 4 6 8 23 24</sup> Chile, as a developing country, has a younger population structure compared with developed countries such as the UK, therefore we would expect a lower crude prevalence of CKD.<sup>25</sup> CKD prevalence in England (among adults aged 16+ years) using the same definition was 5.2% based on Health Survey for England 2009-10 data.<sup>22</sup> Additionally, there is high heterogeneity between countries in the prevalence of comorbid conditions for CKD such as diabetes and hypertension, and other demographic and socioeconomic factors such as age, diet, educational level, geography, pollution and climate,<sup>6 25</sup> so differences in prevalence should be expected. Evidence on gender differences in CKD prevalence is inconclusive, with some studies showing higher prevalence in women - as women tend to develop reduced kidney function at an earlier age than men -<sup>4 6</sup> while others show higher prevalence in men.<sup>26 27</sup> Our analyses suggest similar levels of CKD among men and women in Chile.

Both hypertension and diabetes were significantly associated with higher odds of CKD in multivariable regression models, supporting the evidence that these are important comorbidities for reduced kidney function. Diabetes can lead to several micro- and macrovascular diseases, such as CVD and nephropathy, which contribute significantly to the higher mortality of this group of individuals,<sup>28</sup> as well as having a higher risk of developing CKD.<sup>27</sup> Moreover, there are several studies showing that diabetes is associated with the development of increased albuminuria and faster progression of CKD.<sup>27 29-31</sup> Evidence from other Latin American countries<sup>29-31</sup> suggests that diabetes and worse glycaemic control are significant predictors for increased albuminuria, faster progression of CKD, and need for RRT. On the other hand, a meta-analysis which analysed the risk factors for development and progression of CKD, showed that diabetes was marginally predictive of progression from late-stage CKD to ESKD (HR 1.16, 95% CI 0.98–1.38; *P*=0.08).<sup>27</sup>

Socioeconomic factors may influence both direct and indirect effects on CKD and its complications.<sup>32 33</sup> Although our analyses showed a socioeconomic gradient in the crude prevalence of CKD, with higher prevalence amongst those with fewer years spent in formal education, the educational differences did not attain significance in the fully-adjusted models. Given the marked social and economic inequalities in Chile,<sup>34 35</sup> and the evidence that social

1  
2  
3 environment and economic conditions are important elements in the pathway of CKD, from  
4 the higher prevalence of risk factors to the development and complications of CKD and  
5 ESKD,<sup>2 32 33</sup> our findings suggest that the comorbid conditions that we adjusted for in our  
6 regression analysis are possible mediators of the SEP and CKD relationship. The social  
7 gradient, as captured in the Chilean health surveys by years spent in formal education, is  
8 marked in many of the comorbidities for CKD such as diabetes, hypertension and obesity.<sup>14 15</sup>  
9  
10  
11  
12  
13  
14  
15  
16  
17  
18  
19  
20  
21  
22  
23  
24  
25  
26  
27  
28  
29  
30  
31  
32  
33  
34  
35  
36  
37  
38  
39  
40  
41  
42  
43  
44  
45  
46  
47  
48  
49  
50  
51  
52  
53  
54  
55  
56  
57  
58  
59  
60

<sup>35</sup> Further research is needed using cohort studies in the Chilean population to determine if education or other indicators of SEP are significant predictors of CKD, progression to ESKD and premature mortality,<sup>32</sup> and what the mechanisms are.

Although the prevalence of CKD based on eGFR data was low compared with other countries, our results using an expanded definition showed that **at least** 9.6% of adults aged 40 years and over in ENS 2016-17 had normal kidney function but increased albuminuria, thus considered as CKD Stage 1 or 2 by the KDIGO definition.<sup>5</sup> As albuminuria was not measured in participants without diabetes or hypertension, this estimate must be treated with caution due to the potential underestimation of actual prevalence.

The multivariate analyses showed that being obese (versus normal weight) and having both hypertension and diabetes (compared with diabetes alone) were significantly and independently associated with increased albuminuria. Although these results should be treated with caution for the reason described above, it is important to take our findings into consideration and explore them further, given the high prevalence of diabetes, hypertension and obesity in the Chilean population, as these conditions are associated with a higher risk of increased albuminuria, with increased albuminuria being an independent risk factor for the progression of CKD and premature mortality.<sup>8 9 27</sup>

The inverted-U shape for the age pattern of reduced kidney function (ascertained using eGFR) suggests increased mortality rate in individuals with CKD as the condition progresses to the more advanced stages. This result can probably be explained by the increased all-cause and cardiovascular-mortality of individuals with CKD as their eGFR decreases and levels of albuminuria increase, shown in several studies.<sup>2 9 28 36</sup> Cardiovascular mortality rates can be more than 50% higher in CKD patients, and this risk increases further in those with increased albuminuria.<sup>2</sup> In addition to the higher mortality rates at the more advanced stages of CKD, mortality is higher in the older population compared with younger individuals.<sup>9</sup> This could explain why in Chile, long-term survivors to the more advanced CKD stages are younger compared with individuals at earlier stages. To further investigate this hypothesis, a cohort

1  
2  
3 study of Chilean patients must be conducted to fill the gap in evidence on the incidence and  
4 progression of CKD, including follow-up to death.  
5  
6

7 Our study has several limitations. The use of estimated instead of true GFR may have  
8 introduced bias due to the variations in levels of serum creatinine by differences in muscle  
9 mass, diet and other environmental factors not related to kidney disease, or through  
10 confounding by interactions with variables such as age or weight that are included in the  
11 CKD-EPI equation used to ascertain eGFR.<sup>6 25</sup> Although the introduction of isotope dilution  
12 mass spectrometry (IDMS) calibration for serum creatinine assays has improved the var-  
13 iability of serum creatinine readings, and the use of CKD-EPI instead of MDRD<sup>22 25</sup> has  
14 improved precision, there are still issues with regard to using eGFR to assess CKD  
15 prevalence. Moreover, there is still an ongoing debate as to whether eGFR precisely estimates  
16 true GFR for persons with diabetes,<sup>37 38</sup> obesity,<sup>6 39</sup> and in other populations with different  
17 racial, ethnic and regional variations in muscle mass and diet outside North America, Europe  
18 and Australia.<sup>20</sup> Given the high prevalence of diabetes and obesity in Chile, and due to the  
19 racial and ethnic differences, the results from this study should be treated with caution.  
20 Additionally, relying on single-point-in-time measurements to measure eGFR may have  
21 introduced bias to the results, with possible under- and over-estimation of CKD in younger  
22 and older populations, respectively,<sup>6 40</sup> and an underestimation of the differences between  
23 CKD stages.<sup>40</sup> Future studies looking to obtain more precise estimates may need to consider  
24 including repeated laboratory measurements of serum creatinine, urine albumin and  
25 creatinine to confirm chronicity of the disease, and to measure albuminuria among all adults.  
26  
27  
28  
29  
30  
31  
32  
33  
34  
35  
36  
37  
38  
39

#### 40 **Conclusion and policy implications**

41  
42 Our results show that based on the KDIGO definition for CKD, the prevalence of Stages 1-5  
43 in Chilean adults 40 years and older is 15.4%. Our study provides the distribution by CKD  
44 Stage in this population, showing that 9.6% have increased albuminuria but mildly decreased,  
45 normal or high eGFR (Stages 1 and 2) and that 5.8% have CKD Stages 3a-5. Although the  
46 prevalence of reduced kidney function has not increased significantly between 2009-10 and  
47 2016-17, there is a concerning high percentage of adults with CKD Stages 1 and 2 that should  
48 be considered in prevention strategies and Chilean guidelines. The information from our  
49 study may be useful to clinicians, entities focused on planning prevention strategies and  
50 health-care management, and decision and policy makers.  
51  
52  
53  
54  
55  
56  
57  
58  
59  
60

1  
2  
3 **Funding statement**  
4

5 This work was supported by Chilean Scholarship “Becas Chile, CONICYT”.  
6

7  
8 **Authors contributions**  
9

10 MW and SS and JM contributed to the study design, were involved in analysis and  
11 interpretation of data and preparation of the manuscript. EP and MP were involved in the  
12 preparation of the manuscript.  
13

14  
15 **Competing interests:** None declared.  
16  
17  
18  
19  
20  
21  
22  
23  
24  
25  
26  
27  
28  
29  
30  
31  
32  
33  
34  
35  
36  
37  
38  
39  
40  
41  
42  
43  
44  
45  
46  
47  
48  
49  
50  
51  
52  
53  
54  
55  
56  
57  
58  
59  
60

For peer review only

## References

1. Zhang L, Wang F, Wang L, et al. Prevalence of chronic kidney disease in China: a cross-sectional survey. *Lancet* 2012;379(9818):815-22. doi: 10.1016/s0140-6736(12)60033-6 [published Online First: 2012/03/06]
2. Webster AC, Nagler EV, Morton RL, et al. Chronic Kidney Disease. *Lancet* 2017;389(10075):1238-52. doi: 10.1016/s0140-6736(16)32064-5 [published Online First: 2016/11/27]
3. Bailey RA, Wang Y, Zhu V, et al. Chronic kidney disease in US adults with type 2 diabetes: an updated national estimate of prevalence based on Kidney Disease: Improving Global Outcomes (KDIGO) staging. *BMC Res Notes* 2014;7:415. doi: 10.1186/1756-0500-7-415 [published Online First: 2014/07/06]
4. Hill NR, Fatoba ST, Oke JL, et al. Global Prevalence of Chronic Kidney Disease - A Systematic Review and Meta-Analysis. *PLoS One* 2016;11(7):e0158765. doi: 10.1371/journal.pone.0158765 [published Online First: 2016/07/08]
5. National Guideline C. KDIGO 2012 clinical practice guideline for the evaluation and management of chronic kidney disease. 2012
6. Glasscock RJ, Warnock DG, Delanaye P. The global burden of chronic kidney disease: estimates, variability and pitfalls. *Nat Rev Nephrol* 2017;13(2):104-14. doi: 10.1038/nrneph.2016.163 [published Online First: 2016/12/13]
7. Aitken GR, Roderick PJ, Fraser S, et al. Change in prevalence of chronic kidney disease in England over time: comparison of nationally representative cross-sectional surveys from 2003 to 2010. *BMJ Open* 2014;4(9):e005480. doi: 10.1136/bmjopen-2014-005480 [published Online First: 2014/10/02]
8. Fraser SD, Roderick PJ, Aitken G, et al. Chronic kidney disease, albuminuria and socioeconomic status in the Health Surveys for England 2009 and 2010. *Journal of Public Health* 2013;36(4):577-86. doi: doi:10.1093/pubmed/fdt117
9. Thompson S, James M, Wiebe N, et al. Cause of Death in Patients with Reduced Kidney Function. *J Am Soc Nephrol* 2015;26(10):2504-11. doi: 10.1681/asn.2014070714 [published Online First: 2015/03/04]
10. Poblete Badal H. XXXVII Cuenta de Hemodiálisis Crónica (HDC) en Chile. Registro de Diálisis. [www.nefro.cl](http://www.nefro.cl): Sociedad Chilena de Nefrología, 2017.
11. United States Renal Data System. Volume 2 - End-stage Renal Disease (ESRD) in the United States 2017 [Available from: <https://www.usrds.org/2017/view/Default.aspx> accessed January 2018.
12. Instituto de Salud Pública. Registro Nacional de Trasplante 2017 [www.ispch.cl2017](http://www.ispch.cl2017) [cited 2018 September]. Available from: <http://www.ispch.cl/sites/default/files/Registro%20Nacional%202017.pdf> accessed January 2020.
13. Murphy D, McCulloch CE, Lin F, et al. Trends in Prevalence of Chronic Kidney Disease in the United States. *Ann Intern Med* 2016;165(7):473-81. doi: 10.7326/m16-0273 [published Online First: 2016/08/02]
14. MINSAL. ENS - Encuesta nacional de salud <http://epi.minsal.cl/encuesta-ens-descargable/>: Ministerio Nacional de Salud; 2019 [Available from: <http://epi.minsal.cl/encuesta-ens-descargable/2019>.
15. MINSAL. Encuesta Nacional de Salud ENS Chile 2009-2010: Ministerio de Salud de Chile; 2010 [Available from: <http://web.minsal.cl/portal/url/item/bcb03d7bc28b64dfe040010165012d23.pdf> accessed May 2016 2016.
16. MINSAL. Enfoque de Riesgo para la Prevención de Enfermedades Cardiovasculares. In: Subsecretaría de Salud Pública DdEnT, ed. [www.redcrónicas.cl](http://www.redcrónicas.cl), 2014.

17. McQueen RB, Farahbakhshian S, Bell KF, et al. Economic burden of comorbid chronic kidney disease and diabetes. *J Med Econ* 2017;20(6):585-91. doi: 10.1080/13696998.2017.1288127 [published Online First: 2017/01/28]
18. Vupputuri S, Kimes TM, Calloway MO, et al. The economic burden of progressive chronic kidney disease among patients with type 2 diabetes. *J Diabetes Complications* 2014;28(1):10-6. doi: 10.1016/j.jdiacomp.2013.09.014 [published Online First: 2013/11/12]
19. Mindell JS, Moody A, Vecino-Ortiz AI, et al. Comparison of Health Examination Survey Methods in Brazil, Chile, Colombia, Mexico, England, Scotland, and the United States. *Am J Epidemiol* 2017;186(6):648-58. doi: 10.1093/aje/kwx045 [published Online First: 2017/05/10]
20. Levey AS, Inker LA, Coresh J. GFR estimation: from physiology to public health. *Am J Kidney Dis* 2014;63(5):820-34. doi: 10.1053/j.ajkd.2013.12.006 [published Online First: 2014/02/04]
21. Uehara K, Tominaga N, Shibagaki Y. Adult orthostatic proteinuria. *Clin Kidney J* 2014;7(3):327-8. doi: 10.1093/ckj/sfu040 [published Online First: 2015/04/09]
22. Fraser SD, Aitken G, Taal MW, et al. Exploration of Chronic Kidney Disease Prevalence Estimates Using New Measures of Kidney Function in the Health Survey for England. *PLoS One* 2015;1-16. doi: 10.1371/journal.pone.0118676
23. Coresh J, Selvin E, Stevens LA, et al. Prevalence of chronic kidney disease in the United States. *Jama* 2007;298(17):2038-47. doi: 10.1001/jama.298.17.2038 [published Online First: 2007/11/08]
24. Ramirez-Rubio O, McClean MD, Amador JJ, et al. An epidemic of chronic kidney disease in Central America: an overview. *J Epidemiol Community Health*. England2013;1-3.
25. Hu JR, Coresh J. The public health dimension of chronic kidney disease: what we have learnt over the past decade. *Nephrol Dial Transplant* 2017;32(suppl\_2):ii113-ii20. doi: 10.1093/ndt/gfw416 [published Online First: 2017/02/17]
26. Qin X, Wang Y, Li Y, et al. Risk factors for renal function decline in adults with normal kidney function: a 7-year cohort study. *J Epidemiol Community Health* 2015;69(8):782-8. doi: 10.1136/jech-2014-204962 [published Online First: 2015/02/28]
27. Tsai WC, Wu HY, Peng YS, et al. Risk Factors for Development and Progression of Chronic Kidney Disease: A Systematic Review and Exploratory Meta-Analysis. *Medicine (Baltimore)* 2016;95(11):e3013. doi: 10.1097/md.0000000000003013 [published Online First: 2016/03/18]
28. Fox CS, Matsushita K, Woodward M, et al. Associations of kidney disease measures with mortality and end-stage renal disease in individuals with and without diabetes: a meta-analysis. *Lancet* 2012;380(9854):1662-73. doi: 10.1016/s0140-6736(12)61350-6 [published Online First: 2012/09/28]
29. Chini LSN, Assis LIS, Lugon JR. Relationship between uric acid levels and risk of chronic kidney disease in a retrospective cohort of Brazilian workers. *Brazilian Journal of Medical & Biological Research* 2017;50(9):e6048. doi: <https://dx.doi.org/10.1590/1414-431X20176048>
30. Yepes Delgado CE, Perez Davila S, Montoya Jaramillo M, et al. Stage progression and need for renal replacement therapy in a renal protection programme in Colombia. A cohort study. *Nefrologia* 2017;37(3):330-37. doi: <https://dx.doi.org/10.1016/j.nefro.2016.11.023>
31. Cardoso CRL, Leite NC, Salles GC, et al. Aortic stiffness and ambulatory blood pressure as predictors of diabetic kidney disease: a competing risks analysis from the Rio de Janeiro Type 2 Diabetes Cohort Study. *Diabetologia* 2018;61(2):455-65. doi: <http://dx.doi.org/10.1007/s00125-017-4484-z>
32. Nicholas SB, Kalantar-Zadeh K, Norris KC. Socioeconomic disparities in chronic kidney disease. *Adv Chronic Kidney Dis* 2015;22(1):6-15. doi: 10.1053/j.ackd.2014.07.002 [published Online First: 2015/01/13]
33. Vart P, Gansevoort RT, Joosten MM, et al. Socioeconomic disparities in chronic kidney disease: a systematic review and meta-analysis. *Am J Prev Med* 2015;48(5):580-92. doi: 10.1016/j.amepre.2014.11.004 [published Online First: 2015/04/22]



- 1  
2  
3  
4  
5  
6  
7  
8  
9  
10  
11  
12  
13  
14  
15  
16  
17  
18  
19  
20  
21  
22  
23  
24  
25  
26  
27  
28  
29  
30  
31  
32  
33  
34  
35  
36  
37  
38  
39  
40  
41  
42  
43  
44  
45  
46  
47  
48  
49  
50  
51  
52  
53  
54  
55  
56  
57  
58  
59  
60
34. The World Bank. GINI index (World Bank estimate) - Chile <https://data.worldbank.org>: The World Bank; 2017 [Available from: <https://data.worldbank.org/indicator/SI.POV.GINI?end=2015&locations=CL&start=1987&view=chart> accessed December 2017].
35. Riumallo-Herl CJ, Kawachi I, Avendano M. Social capital, mental health and biomarkers in Chile: assessing the effects of social capital in a middle-income country. *Soc Sci Med* 2014;105:47-58. doi: 10.1016/j.socscimed.2013.12.018 [published Online First: 2014/02/06]
36. Matsushita K, van der Velde M, Astor BC, et al. Association of estimated glomerular filtration rate and albuminuria with all-cause and cardiovascular mortality in general population cohorts: a collaborative meta-analysis. *Lancet* 2010;375(9731):2073-81. doi: 10.1016/s0140-6736(10)60674-5 [published Online First: 2010/05/21]
37. Luis-Lima S, Porrini E. An Overview of Errors and Flaws of Estimated GFR versus True GFR in Patients with Diabetes Mellitus. *Nephron* 2017;136(4):287-91. doi: 10.1159/000453531 [published Online First: 2016/12/16]
38. Porrini E, Ruggerenti P, Luis-Lima S, et al. Estimated GFR: time for a critical appraisal. *Nat Rev Nephrol* 2019;15(3):177-90. doi: 10.1038/s41581-018-0080-9 [published Online First: 2018/12/07]
39. Lemoine S, Guebre-Egziabher F, Sens F, et al. Accuracy of GFR estimation in obese patients. *Clin J Am Soc Nephrol* 2014;9(4):720-7. doi: 10.2215/cjn.03610413 [published Online First: 2014/02/01]
40. De Broe ME, Gharbi MB, Zamd M, et al. Why overestimate or underestimate chronic kidney disease when correct estimation is possible? *Nephrol Dial Transplant* 2017;32(suppl\_2):ii136-ii41. doi: 10.1093/ndt/gfw267 [published Online First: 2017/04/06]

## Legends for Figures:

### Figure 1

Mean age (95% CIs) by eGFR values for ENS 2009-2010 and ENS 2016-2017. eGFR (measured in mL/min/1.73 m<sup>2</sup>) determined by CKD-EPI equation. Presence of CKD (Stages G3a-G5) considered as eGFR <60 mL/min/1.73 m<sup>2</sup>. Categories based on definition by KDIGO.<sup>5</sup>

### Figure 2

**A.** Association between demographics, health behaviours, comorbid conditions and survey year and reduced kidney function (CKD Stages G3a-G5). Reference categories: age: 55-64 years; gender: male; educational level: <8 years; living in urban area; survey year: 2009-2010. Estimate not shown for persons 15-54 due to the very low prevalence of CKD at younger ages. **B.** Association between demographics, health behaviours, comorbid conditions and survey year and increased albuminuria (A2-A3). Reference categories: age: 40-49 years old; gender: male; educational level: <8 years; living in urban area; BMI category: normal (18.5 - 25 kg/m<sup>2</sup>); survey-defined diabetes only; survey year: 2009-2010. Variables not significant at 5% level in individual models were dropped from the final model.

**Figure 1: Mean age by eGFR values in the Chilean population.**

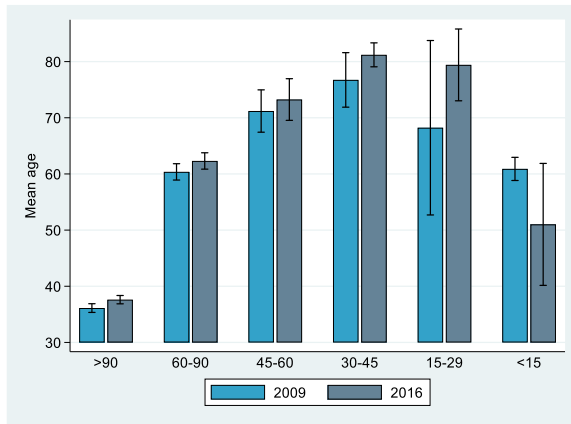

peer review only

**Figure 2. Multivariable logistic regression model**

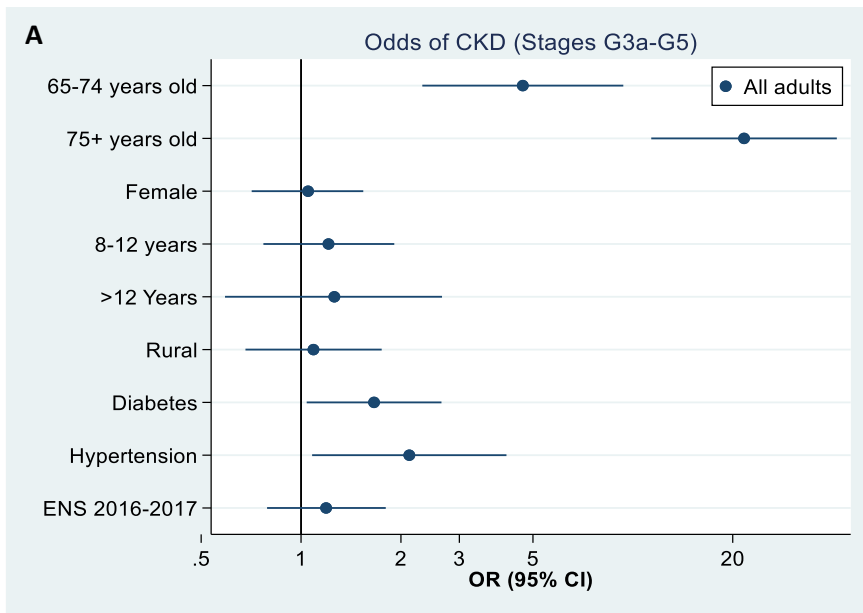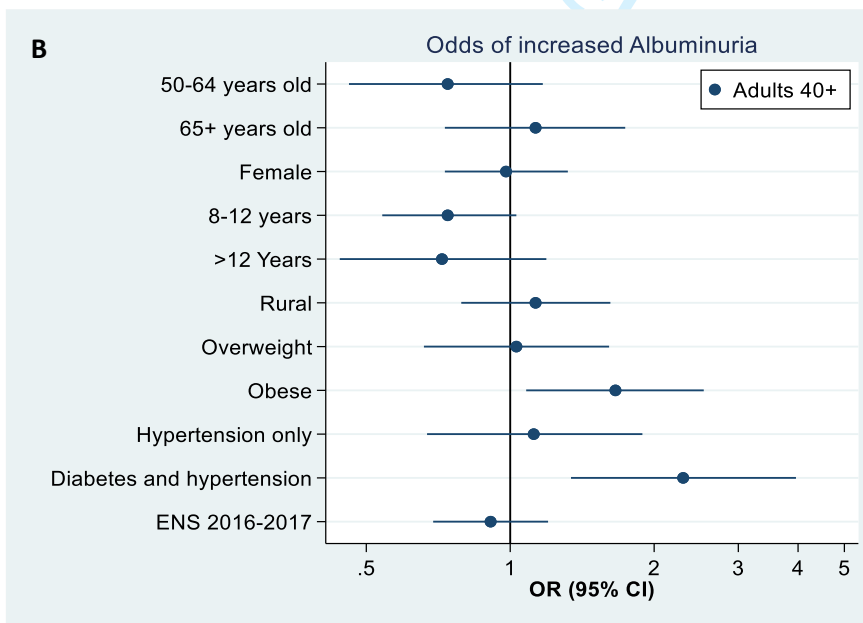

## Supplementary material

Table S1. General characteristics of the sample<sup>a</sup>

| Variable                        | ENS 2009-2010<br>Percentage (%) | ENS 2016-2017<br>Percentage (%) | P value<br>(ENS 2009-2010 vs<br>ENS 2016-2017) |
|---------------------------------|---------------------------------|---------------------------------|------------------------------------------------|
| N                               | 5434                            | 6233                            |                                                |
| Age (years: Mean<br>(±SD))      | 41.54 (±0.42)                   | 43.24 (±0.43)                   | <0.01                                          |
| Sex                             |                                 |                                 | 0.79                                           |
| Female                          | 51.3%                           | 50.9%                           |                                                |
| Male                            | 48.7%                           | 49.1%                           |                                                |
| <i>Educational level</i>        |                                 |                                 | 0.14                                           |
| < 8 years                       | 18.6%                           | 16.4%                           |                                                |
| 8-12 years                      | 56.9%                           | 56.1%                           |                                                |
| >12 years                       | 24.5%                           | 27.5%                           |                                                |
| <i>Urban/Rural area</i>         |                                 |                                 | 0.16                                           |
| Urban                           | 87.1%                           | 89.0%                           |                                                |
| Rural                           | 12.9%                           | 11.0%                           |                                                |
| <i>Smoking behaviour</i>        |                                 |                                 | <0.01                                          |
| Current smoker                  | 40.8%                           | 32.6%                           |                                                |
| Ex-smoker                       | 22.1%                           | 25.9%                           |                                                |
| Non-smoker                      | 37.1%                           | 41.5%                           |                                                |
| <i>BMI<sup>b</sup></i>          |                                 |                                 | <0.01                                          |
| Underweight                     | 1.7%                            | 1.3%                            |                                                |
| Normal                          | 33.9%                           | 24.3%                           |                                                |
| Overweight                      | 39.2%                           | 39.8%                           |                                                |
| Obese                           | 25.2%                           | 34.6%                           |                                                |
| <i>Diabetes<sup>c</sup></i>     |                                 |                                 | <0.01                                          |
| No                              | 91.0%                           | 87.6%                           |                                                |
| Yes                             | 9.0%                            | 12.4%                           |                                                |
| <i>Hypertension<sup>d</sup></i> |                                 |                                 | 0.42                                           |
| No                              | 73.5%                           | 72.3%                           |                                                |
| Yes                             | 26.5%                           | 27.7%                           |                                                |

<sup>a</sup> Adjusted for complex sample design, non-weighted for non-response.

<sup>b</sup> BMI: Body mass index. Underweight BMI <18.5 kg/m<sup>2</sup>; Normal: 18.5-24.9 kg/m<sup>2</sup>; Overweight: 25-29.9 kg/m<sup>2</sup>; Obese: ≥30 kg/m<sup>2</sup>.

<sup>c</sup> Diabetes: Fasting blood glucose ≥126 mg/dl or self-report of medical diagnosis of diabetes.

<sup>d</sup> Hypertension determined by SBP ≥ 140 mmHg and/or DBP ≥ 90 mmHg, or self-report of medical diagnosis of hypertension

**Table S2: Prevalence of CKD (based on eGFR values only) and mean age by eGFR Stages in the Chilean population.**

| eGFR <sup>a</sup><br>(ml/min/1.73 m <sup>2</sup> ) | Prevalence<br>(95% CI) |                        | Mean Age<br>(95% CI)     |                          |
|----------------------------------------------------|------------------------|------------------------|--------------------------|--------------------------|
|                                                    | ENS 2009-2010          | ENS 2016-2017          | ENS 2009-<br>2010        | ENS 2016-<br>2017        |
| >90                                                | 79.0% (77.0, 80.9)     | 79.3% (77.4, 81.1)     | 36.1 (35.3, 36.9)        | 37.6 (36.9, 38.4)        |
| 60-90                                              | 18.7% (16.9, 20.6)     | 17.7% (16.0, 19.5)     | 60.4 (58.9, 61.8)        | 62.3 (60.9, 63.8)        |
| 45-59                                              | 1.5% (1.1, 2.2)        | 2.0% (1.5, 2.6)        | 71.2 (67.4, 74.8)        | 73.3 (69.5, 77.0)        |
| 30-44                                              | 0.5% (0.3, 0.8)        | 0.5% (0.4, 0.8)        | 76.7 (71.9, 81.6)        | 81.2 (80.0, 83.3)        |
| 15-29                                              | 0.2% (0.1, 0.4)        | 0.4% (0.2, 0.8)        | 68.2 (52.7, 83.8)        | 79.4 (73.0, 85.8)        |
| <15                                                | 0.1% (0.0, 0.4)        | 0.1% (0.1, 0.4)        | 60.9 (58.8, 63.0)        | 51.0 (40.2, 61.9)        |
| <b>Total CKD<sup>b</sup></b>                       | <b>2.3% (1.8, 3.0)</b> | <b>3.0% (2.4, 3.8)</b> | <b>71.8 (68.7, 74.9)</b> | <b>74.4 (71.4, 77.4)</b> |

<sup>a</sup> eGFR (measured in ml/min/1.73 m<sup>2</sup>) determined by CKD-EPI equation.

<sup>b</sup> CKD considered as eGFR <60 ml/min/1.73 m<sup>2</sup>. Categories based on definition by KDIGO.

**Table S3. Prevalence of albuminuria and mean age by ACR categories among participants aged 40+ with survey-defined diabetes and/or hypertension.**

| Albuminuria <sup>a</sup><br>(mg/g) | Prevalence<br>(95% CI)    |                           | Mean Age<br>(95% CI)     |                          |
|------------------------------------|---------------------------|---------------------------|--------------------------|--------------------------|
|                                    | ENS 2009-2010             | ENS 2016-2017             | ENS 2009-<br>2010        | ENS 2016-<br>2017        |
| <30                                | 81.5% (78.6, 85.0)        | 84.5% (82.2, 86.5)        | 57.9 (56.9, 58.8)        | 57.5 (56.7, 58.4)        |
| 30-300                             | 15.4% (13.1, 18.1)        | 13.5% (11.5, 15.7)        | 60.7 (58.7, 62.8)        | 63.6 (61.2, 66.1)        |
| >300                               | 3.1% (2.1, 4.6)           | 2.0% (1.5, 2.8)           | 59.2 (54.2, 64.1)        | 67.7 (63.4, 71.9)        |
| <b>Total increased albuminuria</b> | <b>18.5% (16.1, 21.4)</b> | <b>15.5% (13.5, 17.8)</b> | <b>60.5 (58.5, 62.4)</b> | <b>64.1 (61.9, 66.4)</b> |

<sup>a</sup> Albuminuria determined by the urine albumin-creatinine ratio. Normal: <30 mg/g; Moderately increased: 30-300 mg/g; Severely increased >300 mg/g.

STROBE Statement—Checklist of items that should be included in reports of *cross-sectional studies*

|                           | Item No | Recommendation                                                                                                                                                                       | This manuscript                                                                                                          |
|---------------------------|---------|--------------------------------------------------------------------------------------------------------------------------------------------------------------------------------------|--------------------------------------------------------------------------------------------------------------------------|
| <b>Title and abstract</b> | 1       | (a) Indicate the study's design with a commonly used term in the title or the abstract                                                                                               | The word 'surveys' in the title; 'cross-sectional' in the abstract                                                       |
|                           |         | (b) Provide in the abstract an informative and balanced summary of what was done and what was found                                                                                  | yes                                                                                                                      |
| <b>Introduction</b>       |         |                                                                                                                                                                                      |                                                                                                                          |
| Background/rationale      | 2       | Explain the scientific background and rationale for the investigation being reported                                                                                                 | yes                                                                                                                      |
| Objectives                | 3       | State specific objectives, including any prespecified hypotheses                                                                                                                     | Yes, N/A hypothesis                                                                                                      |
| <b>Methods</b>            |         |                                                                                                                                                                                      |                                                                                                                          |
| Study design              | 4       | Present key elements of study design early in the paper                                                                                                                              | yes                                                                                                                      |
| Setting                   | 5       | Describe the setting, locations, and relevant dates, including periods of recruitment, exposure, follow-up, and data collection                                                      | N/A, specifications of the health surveys were reported elsewhere and referenced.                                        |
| Participants              | 6       | (a) Give the eligibility criteria, and the sources and methods of selection of participants                                                                                          | Yes, more details of the health surveys were reported elsewhere and referenced                                           |
| Variables                 | 7       | Clearly define all outcomes, exposures, predictors, potential confounders, and effect modifiers. Give diagnostic criteria, if applicable                                             | yes                                                                                                                      |
| Data sources/measurement  | 8*      | For each variable of interest, give sources of data and details of methods of assessment (measurement). Describe comparability of assessment methods if there is more than one group | yes                                                                                                                      |
| Bias                      | 9       | Describe any efforts to address potential sources of bias                                                                                                                            | We excluded analyses of albuminuria of participants younger than 40 years old. This is explained in the methods section. |
| Study size                | 10      | Explain how the study size was arrived at                                                                                                                                            | yes                                                                                                                      |
| Quantitative variables    | 11      | Explain how quantitative variables were handled in the analyses. If applicable, describe which groupings were chosen and why                                                         | yes                                                                                                                      |
| Statistical methods       | 12      | (a) Describe all statistical methods,                                                                                                                                                | yes                                                                                                                      |



1  
2  
3  
4  
5  
6  
7  
8  
9  
10  
11  
12  
13  
14  
15  
16  
17  
18  
19  
20  
21  
22  
23  
24  
25  
26  
27  
28  
29  
30  
31  
32  
33  
34  
35  
36  
37  
38  
39  
40  
41  
42  
43  
44  
45  
46  
47  
48  
49  
50  
51  
52  
53  
54  
55  
56  
57  
58  
59  
60

including those used to control for confounding

(b) Describe any methods used to examine subgroups and interactions

yes

(c) Explain how missing data were addressed

yes

(d) If applicable, describe analytical methods taking account of sampling strategy

N/A

(e) Describe any sensitivity analyses

We conducted a number of regression analyses adjusting for different variables.

## Results

|                   |     |                                                                                                                                                                                                              |                                                          |
|-------------------|-----|--------------------------------------------------------------------------------------------------------------------------------------------------------------------------------------------------------------|----------------------------------------------------------|
| Participants      | 13* | (a) Report numbers of individuals at each stage of study—eg numbers potentially eligible, examined for eligibility, confirmed eligible, included in the study, completing follow-up, and analysed            | yes                                                      |
|                   |     | (b) Give reasons for non-participation at each stage                                                                                                                                                         | N/A                                                      |
|                   |     | (c) Consider use of a flow diagram                                                                                                                                                                           | No                                                       |
| Descriptive data  | 14* | (a) Give characteristics of study participants (eg demographic, clinical, social) and information on exposures and potential confounders                                                                     | Table S1                                                 |
|                   |     | (b) Indicate number of participants with missing data for each variable of interest                                                                                                                          | No, as missing data was very low for CKD population      |
| Outcome data      | 15* | Report numbers of outcome events or summary measures                                                                                                                                                         | N/A                                                      |
| Main results      | 16  | (a) Give unadjusted estimates and, if applicable, confounder-adjusted estimates and their precision (eg, 95% confidence interval). Make clear which confounders were adjusted for and why they were included | 95% CIs provided for variables and fully adjusted models |
|                   |     | (b) Report category boundaries when continuous variables were categorized                                                                                                                                    | yes                                                      |
|                   |     | (c) If relevant, consider translating estimates of relative risk into absolute risk for a meaningful time period                                                                                             | N/A                                                      |
| Other analyses    | 17  | Report other analyses done—eg analyses of subgroups and interactions, and sensitivity analyses                                                                                                               | yes                                                      |
| <b>Discussion</b> |     |                                                                                                                                                                                                              |                                                          |
| Key results       | 18  | Summarise key results with reference to                                                                                                                                                                      | yes                                                      |

| study objectives         |    |                                                                                                                                                                            |     |
|--------------------------|----|----------------------------------------------------------------------------------------------------------------------------------------------------------------------------|-----|
| Limitations              | 19 | Discuss limitations of the study, taking into account sources of potential bias or imprecision. Discuss both direction and magnitude of any potential bias                 | yes |
| Interpretation           | 20 | Give a cautious overall interpretation of results considering objectives, limitations, multiplicity of analyses, results from similar studies, and other relevant evidence | yes |
| Generalisability         | 21 | Discuss the generalisability (external validity) of the study results                                                                                                      | yes |
| <b>Other information</b> |    |                                                                                                                                                                            |     |
| Funding                  | 22 | Give the source of funding and the role of the funders for the present study and, if applicable, for the original study on which the present article is based              | yes |

\*Give information separately for exposed and unexposed groups.

**Note:** An Explanation and Elaboration article discusses each checklist item and gives methodological background and published examples of transparent reporting. The STROBE checklist is best used in conjunction with this article (freely available on the Web sites of PLoS Medicine at <http://www.plosmedicine.org/>, Annals of Internal Medicine at <http://www.annals.org/>, and Epidemiology at <http://www.epidem.com/>). Information on the STROBE Initiative is available at [www.strobe-statement.org](http://www.strobe-statement.org).

# BMJ Open

## Chronic Kidney Disease in adults aged 18 years and older in Chile: Findings from the cross sectional Chilean National Health Surveys 2009-10 and 2016-17

|                                 |                                                                                                                                                                                                                                                                                                                                                                                                                                   |
|---------------------------------|-----------------------------------------------------------------------------------------------------------------------------------------------------------------------------------------------------------------------------------------------------------------------------------------------------------------------------------------------------------------------------------------------------------------------------------|
| Journal:                        | <i>BMJ Open</i>                                                                                                                                                                                                                                                                                                                                                                                                                   |
| Manuscript ID                   | bmjopen-2020-037720.R1                                                                                                                                                                                                                                                                                                                                                                                                            |
| Article Type:                   | Original research                                                                                                                                                                                                                                                                                                                                                                                                                 |
| Date Submitted by the Author:   | 08-Jun-2020                                                                                                                                                                                                                                                                                                                                                                                                                       |
| Complete List of Authors:       | Walbaum, Magdalena; University College London Research Department of Epidemiology and Public Health,<br>Scholes, Shaun; University College London, Dept of Epidemiology and Public Health<br>Pizzo, Elena; University College London, Applied Health Research<br>Paccot, Melanie; Government of Chile Ministry of Health, Non communicable diseases<br>Mindell, Jennifer; University College London, Epidemiology & Public Health |
| <b>Primary Subject Heading</b>: | Public health                                                                                                                                                                                                                                                                                                                                                                                                                     |
| Secondary Subject Heading:      | Epidemiology                                                                                                                                                                                                                                                                                                                                                                                                                      |
| Keywords:                       | Chronic renal failure < NEPHROLOGY, EPIDEMIOLOGY, PUBLIC HEALTH, NEPHROLOGY                                                                                                                                                                                                                                                                                                                                                       |
|                                 |                                                                                                                                                                                                                                                                                                                                                                                                                                   |

SCHOLARONE™  
Manuscripts



I, the Submitting Author has the right to grant and does grant on behalf of all authors of the Work (as defined in the below author licence), an exclusive licence and/or a non-exclusive licence for contributions from authors who are: i) UK Crown employees; ii) where BMJ has agreed a CC-BY licence shall apply, and/or iii) in accordance with the terms applicable for US Federal Government officers or employees acting as part of their official duties; on a worldwide, perpetual, irrevocable, royalty-free basis to BMJ Publishing Group Ltd ("BMJ") its licensees and where the relevant Journal is co-owned by BMJ to the co-owners of the Journal, to publish the Work in this journal and any other BMJ products and to exploit all rights, as set out in our [licence](#).

The Submitting Author accepts and understands that any supply made under these terms is made by BMJ to the Submitting Author unless you are acting as an employee on behalf of your employer or a postgraduate student of an affiliated institution which is paying any applicable article publishing charge ("APC") for Open Access articles. Where the Submitting Author wishes to make the Work available on an Open Access basis (and intends to pay the relevant APC), the terms of reuse of such Open Access shall be governed by a Creative Commons licence – details of these licences and which [Creative Commons](#) licence will apply to this Work are set out in our licence referred to above.

Other than as permitted in any relevant BMJ Author's Self Archiving Policies, I confirm this Work has not been accepted for publication elsewhere, is not being considered for publication elsewhere and does not duplicate material already published. I confirm all authors consent to publication of this Work and authorise the granting of this licence.

1  
2  
3  
4  
5 **Title:** Chronic Kidney Disease in adults aged 18 years and older in Chile:  
6 Findings from the cross sectional Chilean National Health Surveys 2009-10 and  
7 2016-17  
8  
9

10  
11 **Authors:** Magdalena Walbaum,<sup>1</sup> Shaun Scholes *senior research associate*,<sup>1</sup>  
12 Elena Pizzo,<sup>2</sup> Melanie Paccot,<sup>3</sup> Jennifer S. Mindell<sup>1\*</sup>  
13  
14

15 **Running head:** Chronic Kidney Disease in Chile  
16  
17

18 <sup>1</sup> Health and Social Surveys Research Group, Research Department of  
19 Epidemiology and Public Health, University College London, 1-19 Torrington  
20 Place, London WC1E 6BT, United Kingdom  
21  
22

23 <sup>2</sup> Department of Applied Health Research, UCL, 1-19 Torrington Place, London  
24 WC1E 6BT, United Kingdom  
25

26 <sup>3</sup> Department of Non-communicable diseases, Ministry of Health of Chile, Mac  
27 Iver 541, Santiago, Chile.  
28  
29

30  
31 \* Corresponding author. (e-mail: [j.mindell@ucl.ac.uk](mailto:j.mindell@ucl.ac.uk))  
32  
33

34  
35  
36 **Word count:** 3910  
37  
38

39  
40 ORCID numbers

41  
42 SS: 0000-0002-7865-5264  
43

44  
45 EP: 0000-0003-0790-7505  
46

47  
48 JM: 0000-0002-7604-6131  
49  
50  
51  
52  
53  
54  
55  
56  
57  
58  
59  
60

## ABSTRACT

**Objectives:** This study estimates the prevalence of chronic kidney disease (CKD) among Chilean adults and examines its associations with sociodemographic characteristics, health behaviours, and comorbidities.

**Design:** Analysis of cross-sectional data from the two most recent large nationally representative Chilean Health Surveys (Encuesta Nacional de Salud, ENS) 2009-10 and 2016-17.

**Participants:** Adults aged 18+ years with serum creatine data (ENS 2009-10: n=4583; ENS 2016-17: n=5084).

**Primary and secondary outcome measures:** Reduced kidney function (CKD Stages 3a-5) based on the estimated glomerular filtration rate (eGFR  $<60$  mL/min/1.73 m<sup>2</sup>) was the primary outcome measure. Using the urine albumin-to-creatinine ratio (ACR  $\geq 30$ mg/g), increased albuminuria was ascertained among adults aged 40+ years with diabetes and/or hypertension. Both outcomes were analysed using logistic regression with results summarised using odds ratios (OR). CKD prevalence (Stages 1-5) among adults aged 40+ years was estimated including participants with an eGFR of  $>60$  mL/min/1.73 m<sup>2</sup> but with increased albuminuria (Stages 1-2).

**Results:** Overall, 3.2% (95% CI: 2.4 to 3.8%) of adults aged 18+ in ENS 2016-17 had reduced kidney function. After full adjustment, participants with hypertension (OR 2.37; 95% CI: 1.19 to 4.74) and those with diabetes (OR 1.66; 1.03 to 2.66) had significantly higher odds of reduced kidney function. In ENS 2016-17, 15.5% (13.5% to 17.8%) of adults aged 40+ years with diabetes and/or hypertension had increased albuminuria. Being obese versus normal-weight (OR 1.66; 1.08 to 2.54) and having both diabetes and hypertension versus having diabetes alone (OR 2.30; 1.34 to 3.95) were significantly associated with higher odds of increased albuminuria in fully-adjusted analyses. At least 15.4% of adults aged 40+ years in ENS 2016-17 had CKD (Stages 1-5), including the 9.6% of adults at CKD Stages 1-2.

**Conclusions:** Prevention strategies and Chilean guidelines should consider the high percentage of adults aged 40 years and older at CKD Stages 1-2.

### Strengths and limitations of this study

- Data were from large and nationally representative Chilean Health Surveys.
- Chronic kidney disease (CKD) was ascertained using both the estimated glomerular filtration rate (eGFR) and albuminuria in people aged 40+ years to include all stages of the disease.
- Albuminuria data was available from only a subsample of participants (those with diabetes and/or hypertension).
- Relying on single-point-in-time measurements of serum creatinine and/or albuminuria might induce some bias to the results.
- The observational nature of this study means that only associations between variables can be assessed.

For peer review only

## INTRODUCTION

Chronic kidney disease (CKD) is a leading global public health problem,<sup>1-3</sup> with a substantial burden on healthcare systems; decreased quality of life;<sup>4</sup> and poor prognosis for patients.

CKD is defined as reduced kidney function shown by glomerular filtration rate (GFR) of <60 mL/min/1.73 m<sup>2</sup> (based on measured serum creatinine values) and/or markers of kidney damage (e.g. albuminuria as indicated by increased albumin-to-creatinine ratio, that measures excess albumin excretion in the urine), of at least three months duration, regardless of the underlying cause.<sup>2,5</sup> Evidence recently published suggests that the prevalence of CKD in the general population is increasing worldwide,<sup>6</sup> in part due to population ageing and increases in the prevalence of comorbid conditions for CKD such as hypertension, diabetes mellitus and obesity.<sup>4</sup> However, other studies in high-income countries such as the UK have shown stagnation and even falling prevalence over time.<sup>7</sup>

The natural history of CKD is worsening of kidney function with time. Among the most important complications of CKD are the development of acute kidney failure, progression to end-stage kidney disease (ESKD), and onset of cardiovascular disease (CVD).<sup>1,8</sup> Whilst CKD is a precursor to ESKD, CKD patients are between five and ten times more likely to die prematurely than to progress to ESKD:<sup>2</sup> this is largely attributable to death from CVD.<sup>2,4,9</sup>

In Chile, much attention has been paid to patients with ESKD, who are in need of renal replacement treatment (RRT) such as dialysis or renal transplant, with well-documented registries of the population being treated under these regimes.<sup>10-12</sup> These registers have shown a significant increase in the use of dialysis, with more than 20,000 individuals having dialysis in 2017.<sup>10</sup> However, there is insufficient evidence in Chile on individuals at the earlier stages of the disease.

International studies suggest that given the trends and natural history of CKD,<sup>13</sup> there is a significantly higher prevalence of CKD at the earlier stages, affecting around 35% of individuals aged 70 years and over,<sup>4</sup> with a high burden for healthcare systems. Moreover, there is evidence of increases in the comorbidities for CKD in the Chilean population, such as hypertension, diabetes mellitus and obesity,<sup>14-16</sup> therefore suggesting a probable increase in the current and/or future prevalence of CKD. Although most studies in Chile to date have estimated the economic burden of RRT for ESKD, the increase in healthcare resource utilisation for the earlier stages of CKD is also significant,<sup>17</sup> namely an increase in the use of



1  
2  
3 emergency departments and outpatient visits, hospitalisation, medical expenditure and  
4 pharmacy costs,<sup>17 18</sup> with increasing costs as the disease progresses.<sup>18</sup>  
5  
6

7 The limited data on CKD prevalence and its distribution across population subgroups is an  
8 important gap in the evidence, that impedes effective decision-making in the healthcare  
9 sector. Therefore, it is important to study both the early and end-stages of CKD in the general  
10 population (i.e. not just those patients who are known to the Chilean healthcare system), in  
11 order to have accurate information to help guide strategies for prevention, diagnosis and  
12 treatment of CKD in Chile. Using data from the two most recent Chilean National Health  
13 Surveys (Encuesta Nacional de Salud, ENS) 2009-10 and 2016-17, this study estimates the  
14 prevalence of CKD and examines its associations with sociodemographic characteristics,  
15 health behaviours, and comorbidities.  
16  
17  
18  
19  
20  
21  
22

## 23 **METHODS**

### 24 **Study population and data collection**

25  
26 The sampling design and methods of data collection of the ENS 2009-10 and 2016-17 have  
27 been reported elsewhere, in detail in Spanish<sup>14 15</sup> and in summary in English.<sup>19</sup> Both surveys  
28 were cross-sectional study designs, with a new sample selected each time representative of  
29 the adult Chilean population at national, regional and rural/urban levels. Both were complex  
30 random samples, using multistage, stratified cluster probability sampling of households,  
31 based on the 2002 Chilean National Census.<sup>19</sup> Participants aged 17 years and older completed  
32 a face-to-face interview to provide information on self-reported health, household  
33 characteristics, socioeconomic position (SEP) including years spent in full-time education,  
34 health behaviours, and living conditions (ENS 2009-10: n=5293; ENS 2016-17: n=6233).  
35  
36  
37  
38  
39  
40  
41  
42  
43

44 In the second stage, anthropometric measurements (including height and weight), reported  
45 information on diagnosed conditions, measured blood pressure, and biological samples  
46 (blood and urine) were collected by trained nurses (ENS 2009-10: n=4956; ENS 2016-17:  
47 n=5451). Kidney function was evaluated by measuring blood creatinine using the Jaffé  
48 kinetic method traceable to isotope dilution-mass spectrometry (IDMS) to calculate the  
49 estimated glomerular filtration rate (eGFR). Valid data on the eGFR was available for the  
50 majority of participants aged 18+ assessed at the second stage by trained nurses (ENS 2009-  
51 10: n=4583; ENS 2016-17: n=5084). Although urine samples were collected from all  
52 consenting participants, urinary analyses to determine albuminuria were performed only in  
53 the subsample of individuals classed as having diabetes mellitus (hereafter referred to as  
54  
55  
56  
57  
58  
59  
60

1  
2  
3 diabetes) and/or hypertension (both variables self-reported doctor-diagnosed or identified  
4 from the survey measurements) (ENS 2009-10: n=2523; ENS 2016-17: n=3907).

5  
6  
7 The interview response rates from the eligible population were 85% (ENS 2009-10) and 67%  
8 (ENS 2016-17). Both ENS were approved by the Ethics Research Committee of the Faculty  
9 of Medicine at the Pontificia Universidad Católica de Chile (2009-10: 09-113; 2016-17: 16-  
10 019);<sup>14 15</sup> participants gave written consent prior to data collection, measurements, and  
11 biological sampling.<sup>19</sup>

## 12 13 14 15 16 **Definition of CKD**

17  
18 Given the cross-sectional nature of both health surveys, repeated laboratory values for the  
19 same participant were not possible, so for this study, kidney function (based on serum-  
20 creatinine eGFR), and a marker of kidney damage (based on albuminuria), were estimated  
21 relying on single-point-in-time measurements of serum creatinine and, where available, the  
22 urine albumin-to-creatinine ratio (ACR).

## 23 24 25 26 27 ***Presence of Reduced kidney function using eGFR***

28  
29 Based on the serum creatinine values, the eGFR was calculated for adults aged 18+ years  
30 using the Chronic Kidney Disease Epidemiology Collaboration (CKD-EPI) equation, as this  
31 has shown better accuracy compared with the true GFR than the Modification of Diet in  
32 Renal Disease (MDRD) equation.<sup>20</sup> The continuous values of eGFR (mL/min/1.73 m<sup>2</sup>) were  
33 grouped into six categories based on the Kidney Disease Improving Global Outcomes  
34 (KDIGO)<sup>5</sup> 2012 classification recommendations as follows:

- 35 • G1:  $\geq 90$  mL/min/1.73 m<sup>2</sup> (normal or high);
- 36 • G2: 60–89 mL/min/1.73 m<sup>2</sup> (mildly decreased);
- 37 • G3a: 45–59 mL/min/1.73 m<sup>2</sup> (mildly to moderately decreased);
- 38 • G3b: 30–44 mL/min/1.73 m<sup>2</sup> (moderately to severely decreased);
- 39 • G4: 15–29 mL/min/1.73 m<sup>2</sup> (severely decreased), and
- 40 • G5:  $< 15$  mL/min/1.73 m<sup>2</sup> (kidney failure).

41  
42  
43  
44  
45  
46  
47  
48  
49  
50  
51 As in similar studies, individuals with eGFR  $< 60$  mL/min/1.73 m<sup>2</sup> were classed as having  
52 reduced kidney function (or CKD Stages G3a-G5).

## 53 54 55 ***Presence of increased albuminuria using ACR***

56  
57  
58 Based on the KDIGO classification recommendations,<sup>5</sup> three albuminuria categories were  
59 based on the urine albumin-to-creatinine ratio as follows:

- A1: <30 mg/g (normal to mildly increased);
- A2: 30-300 mg/g (moderately increased); and
- A3: >300 mg/g (severely increased).

Increased albuminuria was defined as an ACR  $\geq 30$  mg/g. Due to orthostatic albuminuria in adolescents and young adults,<sup>21</sup> and no information on whether women were currently menstruating (which could lead to protein contamination of the urine), only participants aged 40 years and over with survey-defined diabetes and/or hypertension were considered for the analysis of albuminuria.

### ***Presence of CKD using eGFR and/or ACR***

The presence of CKD was ascertained using both measures of kidney disease, to include CKD Stages 1 and 2 into the analysis.<sup>13</sup> Adopting both measures was complicated in the present study, however, due to ACR data being available only for participants with survey-defined diabetes and/or hypertension and to the reduced validity of ACR as indicating CKD in participants below the age of 40 years. Hence, we limited this analysis to participants aged 40 years and older.

For participants with no ACR data available, the presence of CKD was ascertained using eGFR data alone (CKD Stages G3a-G5).<sup>5</sup> For participants with diabetes and/or hypertension, the presence of CKD was ascertained using eGFR data (CKD Stages G3a-G5) and/or ACR data (increased albuminuria). Participants with increased albuminuria but having 'mildly decreased', 'normal', or 'high' kidney function (G1-G2) are classified in the KDIGO guidelines as being in CKD Stages 1 or 2 (corresponding to A2 and A3, respectively). For the purposes of clarity, the KDIGO recommendations used in this study to estimate the prevalence of CKD by eGFR and albuminuria categories are set out in Table S1 of the online supplementary appendix. **Demographics, socioeconomic position, health behaviours and comorbid conditions**

Age of participants was grouped into three categories: 18–44, 45–64, and 65+ years for the analysis of reduced kidney function, and in two categories: 40-64, and 65+ years for the analysis of increased albuminuria and the presence of CKD using eGFR and/or ACR. Years spent in formal education was our chosen measure of socioeconomic position (SEP), grouped as <8 years, 8–12 and >12 years.<sup>14</sup> Smoking status at time of interview was categorised as current smoker, ex-smoker and non-smoker. Participants were classed as living in an urban or rural area.<sup>15</sup> Survey-defined diabetes was classed as fasting blood glucose  $\geq 126$  mg/dl [ $\geq 7.0$

1  
2  
3 mmol/L] and/or self-report of medical diagnosis. Similarly, survey-defined hypertension was  
4 classed as systolic blood pressure (SBP)  $\geq 140$  mmHg or diastolic (DBP)  $\geq 90$  mmHg and/or  
5 self-report of medical diagnosis. Body mass index (BMI) was calculated as weight in  
6 kilogrammes (kg) divided by height in metres squared ( $m^2$ ), classifying participants into four  
7 groups: underweight ( $< 18.5$   $kg/m^2$ ), normal weight ( $18.5$ - $24.9$   $kg/m^2$ ), overweight ( $25$ - $29.9$   
8  $kg/m^2$ ) and obese ( $\geq 30$   $kg/m^2$ ).<sup>22 23</sup>  
9

### 14 **Statistical analysis**

16 Using descriptive analysis, we examined the characteristics of the analytical samples (means  
17 and standard deviations for continuous variables, percentages for categorical variables).  
18

#### 21 ***Reduced kidney function***

22 Using the eGFR data only, the distribution of the participants across the six eGFR categories,  
23 and the prevalence of reduced kidney function, was estimated for all adults (aged 18 years  
24 and over) in both survey years. The pattern of reduced kidney function by age was explored  
25 by calculating the mean age of the participants by eGFR category and survey year. In  
26 addition, the prevalence of reduced kidney function in each year was estimated by  
27 demographic factors, SEP, health behaviours, and comorbidities. Underweight participants  
28 were excluded from the statistical modelling due to small numbers and potential confounding  
29 with ill-health. In multivariate analysis on participants with complete data on all variables,  
30 gender- and age-adjusted logistic regression models were used to examine the relationships  
31 between the odds of reduced kidney function and demographics, SEP, health behaviours, and  
32 comorbidities. As the associations did not change over time (data not shown), the results  
33 reported in this present study are taken from the multivariate analysis conducted on data  
34 pooled across the two survey years to increase precision (a binary indicator for survey year  
35 was included in the model). Only those variables that were statistically significant ( $P < 0.05$ )  
36 in the univariate models were retained in the multivariate analyses.  
37  
38  
39  
40  
41  
42  
43  
44  
45  
46  
47

#### 48 ***Increased albuminuria***

49 The same analytical strategies as described above were repeated to examine albuminuria. A  
50 logistic regression model was used to explore the relationships between increased  
51 albuminuria and demographics, SEP, health behaviours, and comorbidities. For the reasons  
52 discussed earlier, this analysis was conducted only on participants aged 40+ years old with  
53 diabetes, hypertension, or both. An additional three-category variable capturing comorbidity  
54  
55  
56  
57  
58  
59  
60

1  
2  
3 (diabetes only, hypertension only, diabetes and hypertension) was included in the regression  
4 model.  
5

### 6 7 ***CKD Stages 1-5***

8  
9 In a final analysis, we examined the distribution of the six eGFR and three albuminuria  
10 categories among participants aged 40 years and older.<sup>3</sup> Using this cross-classification, the  
11 presence of CKD Stages 1 and 2 was estimated using both measures of kidney disease which  
12 identified participants with diabetes and/or hypertension who had an eGFR of > 60  
13 mL/min/1.73 m<sup>2</sup> but with increased albuminuria.  
14  
15

16  
17 All analyses were adjusted for the complex survey design of the ENS and were performed  
18 using Stata V15.1 (StataCorp, College Station, Texas, USA). Statistical significance was set  
19 at  $P < 0.05$  for two-tailed tests, with no adjustment for multiple comparisons.  
20  
21  
22

### 23 24 **Patient and public involvement**

25  
26 Patients or the public were not involved in the design, or conduct, or reporting, or  
27 dissemination plans of our research (which involves secondary analysis of existing data).  
28  
29

## 30 31 32 **RESULTS**

33  
34 The distribution of the analytical sample across the key variables is shown in Table S2 of the  
35 online supplementary appendix. The key variables showed little change over time, with the  
36 exception of a decrease in current smoking and increasing obesity, diabetes, and  
37 hypertension.  
38  
39

### 40 41 42 **Reduced kidney function (CKD Stages G3a-G5)**

43  
44 Table 1 shows the distribution of the participants aged 18+ years across the six eGFR  
45 categories by survey year. The prevalence of reduced kidney function based on eGFR data  
46 alone was 3.2% (95% CI: 2.6 to 4.0%) in ENS 2016-17. There was no statistically significant  
47 difference ( $P = 0.12$ ) from the 2.5% (1.9 to 3.2%) prevalence in ENS 2009-10 (Table 1).  
48  
49  
50  
51  
52  
53  
54  
55  
56  
57  
58  
59  
60

**Table 1.** Prevalence of reduced kidney function (based on eGFR values only) in the Chilean population aged 18 years and older

| CKD Stage <sup>a</sup>   | eGFR <sup>b</sup><br>(mL/min/<br>1.73 m <sup>2</sup> ) | Prevalence  |                         |             |                         |
|--------------------------|--------------------------------------------------------|-------------|-------------------------|-------------|-------------------------|
|                          |                                                        | ENS 2009-10 |                         | ENS 2016-17 |                         |
|                          |                                                        | N           | % (95% CI)              | N           | % (95% CI)              |
| Stage G1 <sup>c</sup>    | ≥90                                                    | 3293        | 77.6.0 (75.5 to 79.6)   | 3511        | 77.9 (75.9 to 79.8)     |
| Stage G2 <sup>c</sup>    | 60-89                                                  | 1104        | 19.9 (18.0 to 21.9)     | 1301        | 18.8 (17.1 to 20.8)     |
| Stage G3a                | 45-59                                                  | 122         | 1.6 (1.2 to 2.3)        | 176         | 2.1 (1.6 to 2.8)        |
| Stage G3b                | 30-44                                                  | 47          | 0.5 (0.3 to 0.8)        | 65          | 0.6 (0.4 to 0.8)        |
| Stage G4                 | 15-29                                                  | 13          | 0.2 (0.1 to 0.4)        | 20          | 0.4 (0.2 to 0.8)        |
| Stage G5                 | <15                                                    | 4           | 0.1 (0.0 to 0.4)        | 11          | 0.1 (0.1 to 0.4)        |
| <b>CKD Stages G3a-G5</b> |                                                        | <b>186</b>  | <b>2.5 (1.9 to 3.2)</b> | <b>272</b>  | <b>3.2 (2.6 to 4.0)</b> |

CKD: chronic kidney disease; CI: confidence interval; eGFR: estimated glomerular filtration rate; ENS: Encuesta Nacional de Salud.

<sup>a</sup> Presence of reduced kidney function or CKD (Stages G3a-G5) indicated by eGFR <60 mL/min/1.73 m<sup>2</sup> in accordance with KDIGO guidelines:<sup>5</sup> shown by cells in dark grey shading. G2: mildly decreased eGFR; G3a: mildly to moderately decreased; G3b: moderately to severely decreased; G4: severely decreased and G5: kidney failure.

<sup>b</sup> eGFR (measured in mL/min/1.73 m<sup>2</sup>) determined by CKD-EPI equation.

<sup>c</sup> Stage G1 and G2 CKD is diagnosed by the presence of raised albuminuria in the presence of normal to high eGFR. Thus, for the purposes of this table, using eGFR values only, these individuals have been classified together with the majority with no CKD.

The prevalence of reduced kidney function by demographics, SEP, health behaviours, and presence of comorbidities in each survey year is shown in Table 2. Patterns of association were similar in each survey. Reduced kidney function prevalence, as expected, increased with age, with prevalence among those aged 65+ years reaching 15.0% (95% CI: 11.5 to 19.2%) and 19.1% (15.3 to 23.6%) in 2009-10 and 2016-17, respectively. For males and females, the prevalence of Stages G3a-G5 was higher in ENS 2016-17 than in ENS 2009-10, but the 95% confidence intervals overlapped. Stages G3a-G5 prevalence was higher among participants with less than 8 years of formal education and was higher among those with diabetes and among those with hypertension.

**Table 2.** Prevalence of reduced kidney function by demographics, socioeconomic position, health behaviours, and comorbidities in Chilean adults 18 years or over.

|            | ENS 2009-10                    | ENS 2016-17                    |
|------------|--------------------------------|--------------------------------|
|            | CKD <sup>a</sup><br>% (95% CI) | CKD <sup>a</sup><br>% (95% CI) |
| <b>Age</b> |                                |                                |
| 18-44      | 0.1 (0.0 to 0.3)               | 0.3 (0.1 to 0.8)               |

|                                 |                     |                     |
|---------------------------------|---------------------|---------------------|
| 45-64                           | 1.9 (1.0 to 3.4)    | 1.3 (0.7 to 2.3)    |
| 65+                             | 15.0 (11.5 to 19.2) | 19.1 (15.3 to 23.6) |
| <b>Gender</b>                   |                     |                     |
| Male                            | 2.0 (1.3 to 3.1)    | 3.3 (2.3 to 4.6)    |
| Female                          | 2.9 (2.1 to 3.9)    | 3.2 (2.4 to 4.3)    |
| <b>Education</b>                |                     |                     |
| <8 years                        | 5.4 (4.1 to 7.3)    | 10.8 (8.1 to 14.3)  |
| 8-12 years                      | 1.9 (1.3 to 2.9)    | 1.9 (1.3 to 2.6)    |
| >12 years                       | 1.5 (0.6 to 3.4)    | 1.3 (0.6 to 2.7)    |
| <b>Residence</b>                |                     |                     |
| Urban                           | 2.4 (1.8 to 3.2)    | 3.0 (2.4 to 3.9)    |
| Rural                           | 3.0 (1.7 to 5.2)    | 4.8 (3.2 to 7.1)    |
| <b>Smoking</b>                  |                     |                     |
| Current                         | 1.1 (0.6 to 2.2)    | 0.6 (0.2 to 1.4)    |
| Ex-smoker                       | 3.2 (2.1 to 5.0)    | 4.9 (3.5 to 6.8)    |
| Never                           | 3.4 (2.3 to 5.0)    | 4.4 (3.2 to 5.9)    |
| <b>BMI<sup>b</sup></b>          |                     |                     |
| Underweight                     | 9.1 (2.3 to 29.9)   | 11.7 (3.3 to 34.1)  |
| Normal                          | 2.0 (1.2 to 3.2)    | 2.7 (1.7 to 4.1)    |
| Overweight                      | 2.4 (1.5 to 3.9)    | 2.9 (1.9 to 4.4)    |
| Obese                           | 2.6 (1.6 to 4.1)    | 3.5 (2.5 to 4.8)    |
| <b>Diabetes<sup>c</sup></b>     |                     |                     |
| No                              | 1.8 (1.4 to 2.5)    | 2.5 (1.9 to 3.4)    |
| Yes                             | 7.6 (4.4 to 12.8)   | 8.1 (5.7 to 11.4)   |
| <b>Hypertension<sup>d</sup></b> |                     |                     |
| No                              | 1.0 (0.6 to 1.7)    | 0.6 (0.4 to 1.0)    |
| Yes                             | 6.3 (4.7 to 8.4)    | 9.6 (7.6 to 12.1)   |

CKD: chronic kidney disease; CI: confidence interval; eGFR: estimated glomerular filtration rate; ENS: Encuesta Nacional de Salud  
<sup>a</sup>eGFR (measured in mL/min/1.73 m<sup>2</sup>) determined by CKD-EPI equation. Presence of reduced kidney function or CKD (Stages G3a-G5) considered when eGFR <60 mL/min/1.73 m<sup>2</sup>.

<sup>b</sup> BMI: Body mass index. Underweight: BMI <18.5 kg/m<sup>2</sup>; normal weight: BMI 18.5-24.9 kg/m<sup>2</sup>; overweight: BMI 25-29.9 kg/m<sup>2</sup>; obese: BMI ≥30 kg/m<sup>2</sup>.

<sup>c</sup> Diabetes: Fasting blood glucose ≥126 mg/dl [≥7.0 mmol/L] and/or self-report of medical diagnosis.

<sup>d</sup> Hypertension: SBP ≥ 140 mm Hg and/or DBP ≥ 90 mm Hg, and/or self-report of medical diagnosis.

The mean age of participants aged 18 years and older across the six eGFR categories in both ENS followed an inverted U shape, as shown in Figure 1. Mean age increased as kidney function decreased until eGFR 30-45mL/min/1.73m<sup>2</sup>, but was then lower at Stages G4 (severely decreased kidney function) and G5 (kidney failure) (Supplementary Table S3 showing the mean and 95% CI values).

**Figure 1: Mean age by eGFR values in the Chilean adults aged 18 years and over**

Figure 2A shows the results from the multivariable logistic regression model of reduced kidney function (Stages G3a-G5) among all participants aged 18+ years. After adjustment for age and gender, participants with hypertension (OR 2.37; 95% CI: 1.19 to 4.74) and participants with diabetes (OR 1.66; 1.03 to 2.66) had significantly higher odds of reduced kidney function. Educational level and living in rural areas (versus urban) did not show any association with reduced kidney function in fully-adjusted analyses.

**Figure 2: Multivariable logistic regression models (reduced kidney function and increased albuminuria)**

**Increased albuminuria (ACR  $\geq$ 30mg/g)**

The estimates and accompanying 95% CIs for the presence of increased albuminuria among adults aged 40 years and over in whom it was measured are shown in Table S4 of the online supplementary appendix. Among participants aged 40+ years with measured ACR (and so had diabetes and/or hypertension), the prevalence of increased albuminuria was 18.3% (15.8 to 21.2%) and 15.5% (13.5 to 17.8%) in ENS 2009-10 and ENS 2016-17, respectively. The pattern by gender showed some difference over time, being higher for men in ENS 2009-10 (20.0% in men versus 16.8% among women) but lower in ENS 2016-17 (12.3% in men, 18.4% among women) (Table 3).

**Table 3.** Prevalence of increased albuminuria by demographics, socioeconomic position, health behaviours, and comorbidities

|            | ENS 2009-10                        | ENS 2016-17                        |
|------------|------------------------------------|------------------------------------|
|            | Increased albuminuria <sup>a</sup> | Increased albuminuria <sup>a</sup> |
|            | % (95% CI)                         | % (95% CI)                         |
| <b>Age</b> |                                    |                                    |
| 40-64      | 17.0 (13.1 to 21.7)                | 11.2 (8.9 to 14.0)                 |
| 65+        | 21.9 (17.9 to 26.5)                | 26.4 (22.2 to 31.1)                |



|                                 |                     |                     |
|---------------------------------|---------------------|---------------------|
| <b>Gender</b>                   |                     |                     |
| Male                            | 20.0 (16.0 to 24.7) | 12.3 (9.9 to 15.2)  |
| Female                          | 16.8 (13.7 to 20.5) | 18.4 (15.4 to 21.9) |
| <b>Education</b>                |                     |                     |
| <8 years                        | 24.1 (19.8 to 29.1) | 21.3 (17.9 to 25.3) |
| 8-12 years                      | 14.7 (11.6 to 18.4) | 14.1 (11.0 to 17.8) |
| >12 years                       | 17.2 (10.8 to 26.2) | 10.1 (6.3 to 15.7)  |
| <b>Residence</b>                |                     |                     |
| Urban                           | 17.7 (15.0 to 20.8) | 15.3 (13.1 to 17.8) |
| Rural                           | 22.0 (15.5 to 30.2) | 17.0 (13.0 to 22.0) |
| <b>Smoking</b>                  |                     |                     |
| Current                         | 17.5 (13.0 to 23.0) | 14.2 (10.0 to 19.8) |
| Ex-smoker                       | 21.4 (16.1 to 28.0) | 15.5 (12.0 to 19.8) |
| Never                           | 17.2 (13.7 to 21.4) | 16.4 (13.3 to 20.0) |
| <b>BMI<sup>b</sup></b>          |                     |                     |
| Underweight                     | 17.7 (4.5 to 49.3)  | 15.9 (3.5 to 49.3)  |
| Normal                          | 14.6 (9.7 to 21.5)  | 14.8 (10.3 to 20.7) |
| Overweight                      | 15.6 (12.2 to 19.6) | 11.1 (8.6 to 14.1)  |
| Obese                           | 22.7 (18.0 to 28.1) | 19.4 (15.8 to 23.7) |
| <b>Diabetes<sup>c</sup></b>     |                     |                     |
| No                              | 15.9 (13.2 to 19.1) | 11.3 (9.2 to 13.8)  |
| Yes                             | 27.7 (21.2 to 35.2) | 29.2 (23.6 to 35.6) |
| <b>Hypertension<sup>d</sup></b> |                     |                     |
| No                              | 9.4 (6.8 to 12.8)   | 6.2 (4.3 to 8.9)    |
| Yes                             | 23.0 (19.5 to 26.9) | 22.5 (19.4 to 25.9) |

<sup>a</sup>Albuminuria results limited to participants aged 40+ with diabetes and/or hypertension (diagnosed or survey-detected). Albuminuria determined by the urine albumin-creatinine ratio (ACR, measured in mg/g). Increased albuminuria (A2-A3) considered when ACR  $\geq 30$ mg/g.

<sup>b</sup> BMI: Body mass index. Underweight: BMI  $< 18.5$  kg/m<sup>2</sup>; normal weight: BMI 18.5-24.9 kg/m<sup>2</sup>; overweight: BMI 25-29.9 kg/m<sup>2</sup>; obese: BMI  $\geq 30$  kg/m<sup>2</sup>.

<sup>c</sup> Diabetes: Fasting blood glucose  $\geq 126$  mg/dl [ $\geq 7.0$  mmol/L] and/or self-report of medical diagnosis.

<sup>d</sup> Hypertension: SBP  $\geq 140$  mm Hg and/or DBP  $\geq 90$  mm Hg, and/or self-report of medical diagnosis.

Figure 2B shows the results from the multivariable logistic regression model of increased albuminuria. After adjusting for age and gender, being obese versus normal weight (OR 1.66; 95% CI: 1.08 to 2.54) and having diabetes and hypertension versus having diabetes alone (OR 2.30; 95% CI: 1.34 to 3.95) were significantly associated with higher odds of increased albuminuria. Participants with higher levels of formal education (compared with <8 years)

1  
2  
3 had lower odds of increased albuminuria, although the results did not attain statistical  
4 significance (8-12y: OR 0.74; 95% CI: 0.54 to 1.03; >12y: OR 0.72; 95% CI: 0.44 to 1.19).  
5  
6

### 7 **CKD (Stages 1-5)**

8

9 Table 4 shows the distribution of the six eGFR and three albuminuria categories among ENS  
10 participants aged 40+ years. Prevalence of CKD based on eGFR data (Stages G3a-G5) was  
11 4.4% in ENS 2009-10 and 5.8% in ENS 2016-17 (shown in Table 4 by the row percentages).  
12  
13 Prevalence of increased albuminuria based on ACR data among those with diabetes and/or  
14 hypertension was 12.0% in ENS 2009-10 and 11.7% in ENS 2016-17 (shown in Table 4 by  
15 the column percentages).  
16  
17  
18  
19  
20  
21  
22  
23  
24  
25  
26  
27  
28  
29  
30  
31  
32  
33  
34  
35  
36  
37  
38  
39  
40  
41  
42  
43  
44  
45  
46  
47  
48  
49  
50  
51  
52  
53  
54  
55  
56  
57  
58  
59  
60

**Table 4. Distribution of CKD by eGFR and ACR among participants aged 40+.**

| eGFR category <sup>a</sup>  | Albuminuria category <sup>b</sup> |                            |             |                            |               |                           |             |                         |             |                            |
|-----------------------------|-----------------------------------|----------------------------|-------------|----------------------------|---------------|---------------------------|-------------|-------------------------|-------------|----------------------------|
|                             | Not measured <sup>c</sup>         |                            | A1 <30mg/g  |                            | A2 30-300mg/g |                           | A3 >300mg/g |                         | Row         |                            |
|                             | N                                 | % (95% CI)                 | N           | % (95% CI)                 | N             | % (95% CI)                | N           | % (95% CI)              | N           | % (95% CI)                 |
| <b>2009-10</b>              |                                   |                            |             |                            |               |                           |             |                         |             |                            |
| G1 [ $\geq 90$ ]            | 645                               | 25.5 (22.6 to 28.6)        | 869         | 30.6 (27.7 to 33.6)        | 149           | 4.7 (3.7 to 6.0)          | 24          | 0.9 (0.4 to 1.8)        | <b>1687</b> | <b>61.7 (58.4 to 64.9)</b> |
| G2 [60-89]                  | 217                               | 8.6 (6.5 to 11.1)          | 671         | 20.5 (18.1 to 23.1)        | 142           | 4.1 (3.1 to 5.4)          | 23          | 0.7 (0.4 to 1.2)        | <b>1053</b> | <b>33.9 (30.7 to 37.2)</b> |
| G3a [45-59]                 | 15                                | 0.3 (0.1 to 0.8)           | 66          | 1.6 (1.0 to 2.6)           | 31            | 0.9 (0.5 to 1.6)          | 8           | 0.1 (0.0 to 0.3)        | <b>120</b>  | <b>2.9 (2.1 to 4.1)</b>    |
| G3b [30-44]                 | 8                                 | 0.2 (0.1 to 0.6)           | 23          | 0.5 (0.3 to 0.9)           | 11            | 0.2 (0.1 to 0.5)          | 5           | 0.1 (0.0 to 0.1)        | <b>47</b>   | <b>1.0 (0.6 to 1.5)</b>    |
| G4 [15-29]                  | 2                                 | 0.0 (0.0 to 0.1)           | 2           | 0.0 (0.0 to 0.2)           | 3             | 0.1 (0.0 to 0.5)          | 5           | 0.2 (0.0 to 0.5)        | <b>12</b>   | <b>0.3 (0.1 to 0.8)</b>    |
| G5 [ $< 15$ ]               | 2                                 | 0.2 (0.0 to 0.9)           | 0           | -                          | 0             | -                         | 2           | 0.0 (0.0 to 0.1)        | <b>4</b>    | <b>0.2 (0.0 to 0.8)</b>    |
| <b>Column N, % (95% CI)</b> | <b>889</b>                        | <b>34.8 (31.6 to 38.0)</b> | <b>1631</b> | <b>53.3 (50.0 to 56.5)</b> | <b>336</b>    | <b>10.1 (8.5 to 11.9)</b> | <b>67</b>   | <b>1.9 (1.3 to 2.8)</b> | <b>2923</b> | <b>100 (N/A)</b>           |
| <b>2016-17</b>              |                                   |                            |             |                            |               |                           |             |                         |             |                            |
| G1 [ $\geq 90$ ]            | 484                               | 17.9 (15.5 to 20.5)        | 1294        | 40.2 (37.4 to 43.1)        | 167           | 4.8 (3.6 to 6.4)          | 16          | 0.4 (0.2 to 0.8)        | <b>1961</b> | <b>63.3 (60.3 to 66.1)</b> |
| G2 [60-89]                  | 196                               | 5.2 (4.0 to 6.8)           | 866         | 21.3 (19.0 to 23.8)        | 164           | 3.8 (3.0 to 4.8)          | 26          | 0.6 (0.4 to 1.0)        | <b>1252</b> | <b>31.0 (28.3 to 33.9)</b> |
| G3a [45-59]                 | 19                                | 0.4 (0.2 to 0.9)           | 107         | 2.3 (1.6 to 3.4)           | 36            | 0.8 (0.5 to 1.4)          | 14          | 0.3 (0.1 to 0.6)        | <b>176</b>  | <b>3.8 (2.9 to 4.9)</b>    |
| G3b [30-44]                 | 6                                 | 0.0 (0.0 to 0.1)           | 33          | 0.5 (0.3 to 0.8)           | 18            | 0.4 (0.2 to 0.7)          | 8           | 0.1 (0.0 to 0.2)        | <b>65</b>   | <b>1.0 (0.7 to 1.4)</b>    |
| G4 [15-29]                  | 2                                 | 0.1 (0.0 to 0.7)           | 4           | 0.2 (0.1 to 0.7)           | 8             | 0.3 (0.1 to 0.8)          | 6           | 0.1 (0.0 to 0.6)        | <b>20</b>   | <b>0.7 (0.4 to 1.4)</b>    |
| G5 [ $< 15$ ]               | 5                                 | 0.2 (0.0 to 0.8)           | 0           | -                          | 0             | -                         | 5           | 0.1 (0.0 to 0.2)        | <b>10</b>   | <b>0.2 (0.1 to 0.7)</b>    |
| <b>Column N, % (95% CI)</b> | <b>712</b>                        | <b>23.8 (21.1 to 26.7)</b> | <b>2304</b> | <b>64.5 (61.4 to 67.5)</b> | <b>393</b>    | <b>10.1 (8.6 to 11.9)</b> | <b>75</b>   | <b>1.6 (1.1 to 2.2)</b> | <b>3484</b> | <b>100 (N/A)</b>           |

ACR: albumin-creatinine ratio; CKD: chronic kidney disease; eGFR: estimated glomerular filtration rate

<sup>a</sup>eGFR (measured in mL/min/1.73 m<sup>2</sup>) determined by CKD-EPI equation. G1: Normal to high eGFR; G2: Mildly decreased eGFR; G3a: mildly to moderately decreased; G3b: moderately to severely decreased; G4: severely decreased and G5: kidney failure.

<sup>b</sup>Albuminuria determined by the urine albumin-creatinine ratio (ACR, measured in mg/g). A1 (normal): <30 mg/g; A2 (moderately increased): 30-300 mg/g; A3 (severely increased): >300 mg/g.

<sup>c</sup>Albuminuria not measured as these participants had no diabetes or hypertension.

1  
2  
3 The prevalence of CKD in adults aged 40 years and older, based on eGFR and albuminuria  
4 criteria (CKD stages 1 to 5), was 14.8% in ENS 2009-10 and 15.4% in ENS 2016-17. Based  
5 on the ENS 2009-10, those with CKD comprised the 10.4% with increased albuminuria but  
6 mildly decreased, normal or high eGFR (5.6% at CKD Stage 1; 4.8% at CKD Stage 2), and  
7 the 4.4% at CKD Stages 3a-5. Similarly, based on the ENS 2016-17, those with CKD  
8 comprised the 9.6% with increased albuminuria but mildly decreased, normal or high eGFR  
9 (5.2% at CKD Stage 1; 4.4% at CKD Stage 2) and the 5.8% at CKD Stages 3a-5.  
10  
11  
12  
13  
14  
15  
16  
17  
18  
19  
20  
21  
22  
23  
24  
25  
26  
27  
28  
29  
30  
31  
32  
33  
34  
35  
36  
37  
38  
39  
40  
41  
42  
43  
44  
45  
46  
47  
48  
49  
50  
51  
52  
53  
54  
55  
56  
57  
58  
59  
60

For peer review only

## DISCUSSION

In this representative sample of the Chilean population, the prevalence of reduced kidney function estimated by eGFR <60 mL/min/1.73 m<sup>2</sup> (CKD Stages G3a-G5) in adults 18 years and older was 3.2% in the most recent survey (ENS 2016-17). There is some difference from the prevalence reported in other developing and developed countries.<sup>1 2 4 6 8 24 25</sup> Chile, as a developing country, has a younger population structure compared with developed countries such as the UK, therefore we would expect a lower crude prevalence of CKD.<sup>26</sup> CKD prevalence in England (among adults aged 16+ years) using the same definition was 5.2% based on Health Survey for England 2009-10 data.<sup>22</sup> Additionally, there is high heterogeneity between countries in the prevalence of comorbid conditions for CKD such as diabetes and hypertension, and other demographic and socioeconomic factors such as age, diet, educational level, geography, pollution and climate,<sup>6 26</sup> so differences in prevalence should be expected. Evidence on gender differences in CKD prevalence is inconclusive, with some studies showing higher prevalence in women - as women tend to develop reduced kidney function at an earlier age than men<sup>4 6</sup> while others show higher prevalence in men.<sup>27 28</sup> Our analyses suggest similar levels of CKD among men and women in Chile (P=0.52).

Both hypertension and diabetes were significantly associated with higher odds of CKD in multivariable regression models, supporting the evidence that these are important comorbidities for reduced kidney function. Diabetes can lead to several micro- and macrovascular diseases, such as CVD and nephropathy, which contribute significantly to the higher mortality of this group of individuals,<sup>29</sup> as well as having a higher risk of developing CKD.<sup>28</sup> Moreover, there are several studies showing that diabetes is associated with the development of increased albuminuria and faster progression of CKD.<sup>28 30-32</sup> Evidence from other Latin American countries<sup>30-32</sup> suggests that diabetes and worse glycaemic control are significant predictors for increased albuminuria, faster progression of CKD, and need for RRT. On the other hand, a meta-analysis which analysed the risk factors for development and progression of CKD, showed that diabetes was marginally predictive of progression from late-stage CKD to ESKD (HR 1.16, 95% CI: 0.98–1.38; P=0.08).<sup>28</sup>

Socioeconomic factors may influence both direct and indirect effects on CKD and its complications.<sup>33 34</sup> Although our analyses showed a socioeconomic gradient in the crude prevalence of reduced kidney function, with higher prevalence amongst those with fewer years spent in formal education, the educational differences did not attain significance in the fully-adjusted models. Given the marked social and economic inequalities in Chile,<sup>35 36</sup> and

1  
2  
3 the evidence that social environment and economic conditions are important elements in the  
4 pathway of CKD, from the higher prevalence of risk factors to the development and  
5 complications of CKD and ESKD,<sup>2 33 34</sup> our findings suggest that the comorbid conditions  
6 that we adjusted for in our regression analysis are possible mediators of the SEP and CKD  
7 relationship. The social gradient, as captured in the Chilean health surveys by years spent in  
8 formal education, is marked in many of the comorbidities for CKD such as diabetes,  
9 hypertension and obesity.<sup>14 15 36</sup> Further research is needed using cohort studies in the Chilean  
10 population to determine if education or other indicators of SEP are significant predictors of  
11 CKD, progression to ESKD and premature mortality,<sup>33</sup> and what the mechanisms are.

12  
13 Although the prevalence of CKD based on eGFR data was low compared with other  
14 countries, our results using both estimates of eGFR and albuminuria showed that **at least**  
15 9.6% of adults aged 40 years and over in ENS 2016-17 had normal kidney function but  
16 increased albuminuria, thus considered as CKD Stage 1 or 2 by the KDIGO definition.<sup>5</sup> As  
17 albuminuria was not measured in participants without diabetes or hypertension, this estimate  
18 must be treated with caution due to the potential underestimation of actual prevalence.

19  
20 The multivariate analyses showed that being obese (versus normal weight) and having both  
21 hypertension and diabetes (compared with diabetes alone) were significantly and  
22 independently associated with increased albuminuria. Although these results should be  
23 treated with caution for the reason described above, it is important to take our findings into  
24 consideration and explore them further, given the high prevalence of diabetes, hypertension  
25 and obesity in the Chilean population, as these conditions are associated with a higher risk of  
26 increased albuminuria, with increased albuminuria being an independent risk factor for the  
27 progression of CKD and premature mortality.<sup>8 9 28</sup>

28  
29 The inverted-U shape for the age pattern of reduced kidney function (ascertained using  
30 eGFR) suggests increased mortality rate in individuals with CKD as the condition progresses  
31 to the more advanced stages. This result can probably be explained by the increased all-cause  
32 and cardiovascular-mortality of individuals with CKD as their eGFR decreases and levels of  
33 albuminuria increase, shown in several studies.<sup>2 9 29 37</sup> Cardiovascular mortality rates can be  
34 more than 50% higher in CKD patients, and this risk increases further in those with increased  
35 albuminuria.<sup>2</sup> In addition to the higher mortality rates at the more advanced stages of CKD,  
36 mortality is higher in the older population compared with younger individuals.<sup>9</sup> This could  
37 explain why in Chile, long-term survivors to the more advanced CKD stages are younger  
38 compared with individuals at earlier stages. To further investigate this hypothesis, a cohort  
39  
40  
41  
42  
43  
44  
45  
46  
47  
48  
49  
50  
51  
52  
53  
54  
55  
56  
57  
58  
59  
60

1  
2  
3 study of Chilean patients must be conducted to fill the gap in evidence on the incidence and  
4 progression of CKD, including follow-up to death.  
5  
6

7 Our study has several limitations. The use of estimated instead of true GFR may have  
8 introduced bias due to the variations in levels of serum creatinine by differences in muscle  
9 mass, diet and other environmental factors not related to kidney disease, or through  
10 confounding by interactions with variables such as age or weight that are included in the  
11 CKD-EPI equation used to ascertain eGFR.<sup>6 26</sup> Although the introduction of IDMS calibration  
12 for serum creatinine assays has improved the variability of serum creatinine readings, and the  
13 use of CKD-EPI instead of MDRD<sup>22 26</sup> has improved precision, there are still issues with  
14 regard to using eGFR to assess CKD prevalence. Moreover, there is still an ongoing debate as  
15 to whether eGFR precisely estimates true GFR for persons with diabetes,<sup>38 39</sup> obesity,<sup>6 40</sup> and  
16 in other populations with different racial, ethnic and regional variations in muscle mass and  
17 diet outside North America, Europe and Australia.<sup>20</sup> Given the high prevalence of diabetes  
18 and obesity in Chile, and due to the racial and ethnic differences, the results from this study  
19 should be treated with caution. Additionally, relying on single-point-in-time measurements to  
20 measure eGFR may have introduced bias to the results, with possible under- and over-  
21 estimation of CKD in younger and older populations, respectively,<sup>6 41</sup> and an underestimation  
22 of the differences between CKD stages.<sup>41</sup> Future studies looking to obtain more precise  
23 estimates may need to consider including repeated laboratory measurements of serum  
24 creatinine, urine albumin and creatinine to confirm chronicity of the disease, and to measure  
25 albuminuria among all adults.  
26  
27  
28  
29  
30  
31  
32  
33  
34  
35  
36  
37  
38  
39

#### 40 **Conclusion and policy implications**

41  
42 Our results show that based on the KDIGO definition for CKD, the prevalence of Stages 1-5  
43 in Chilean adults 40 years and older is 15.4%. Our study provides the distribution by CKD  
44 Stage in this population, showing that 9.6% have increased albuminuria but mildly decreased,  
45 normal or high eGFR (Stages 1 and 2) and that 5.8% have CKD Stages 3a-5. Although the  
46 prevalence of reduced kidney function has not increased significantly between 2009-10 and  
47 2016-17, there is a concerning high percentage of adults 40 years and over with CKD Stages  
48 1 and 2 that should be considered in prevention strategies and Chilean guidelines. The  
49 information from our study may be useful to clinicians, entities focused on planning  
50 prevention strategies and health-care management, and decision and policy makers.  
51  
52  
53  
54  
55  
56  
57  
58  
59  
60

### **Funding statement**

This work was supported by Chilean Scholarship “Becas Chile, CONICYT”. The funders had no role in the analysis, interpretation of data, decision to publish or preparation of the manuscript for this specific study.

EP was funded by the United Kingdom National Institute for Health Research (NIHR) Applied Research Collaboration North Thame (ARC North Thames) at Barts Health NHS Trust. The views expressed are those of the author(s) and not necessarily those of the NHS, the NIHR or the Department of Health and Social Care.

### **Data Sharing Statement**

The full data sets can be accessed in through the Ministry of Health of Chile website found at: <http://epi.minsal.cl/encuestas-poblacionales/>

### **Ethical approval**

Both Health Surveys were approved by the Ethics Research Committee of the Faculty of Medicine at the Pontificia Universidad Católica de Chile.

### **Patient and Public Involvement**

No patient involved

### **Authors contributions**

MW and SS and JM contributed to the study design, were involved in analysis and interpretation of data and preparation of the manuscript. EP and MP were involved in the preparation of the manuscript.

**Competing interests:** The authors declare that they have no competing interests.



## References

1. Zhang L, Wang F, Wang L, et al. Prevalence of chronic kidney disease in China: a cross-sectional survey. *Lancet* 2012;379(9818):815-22. doi: 10.1016/s0140-6736(12)60033-6 [published Online First: 2012/03/06]
2. Webster AC, Nagler EV, Morton RL, et al. Chronic Kidney Disease. *Lancet* 2017;389(10075):1238-52. doi: 10.1016/s0140-6736(16)32064-5 [published Online First: 2016/11/27]
3. Bailey RA, Wang Y, Zhu V, et al. Chronic kidney disease in US adults with type 2 diabetes: an updated national estimate of prevalence based on Kidney Disease: Improving Global Outcomes (KDIGO) staging. *BMC Res Notes* 2014;7:415. doi: 10.1186/1756-0500-7-415 [published Online First: 2014/07/06]
4. Hill NR, Fatoba ST, Oke JL, et al. Global Prevalence of Chronic Kidney Disease - A Systematic Review and Meta-Analysis. *PLoS One* 2016;11(7):e0158765. doi: 10.1371/journal.pone.0158765 [published Online First: 2016/07/08]
5. National Guideline C. KDIGO 2012 clinical practice guideline for the evaluation and management of chronic kidney disease. 2012
6. Glasscock RJ, Warnock DG, Delanaye P. The global burden of chronic kidney disease: estimates, variability and pitfalls. *Nat Rev Nephrol* 2017;13(2):104-14. doi: 10.1038/nrneph.2016.163 [published Online First: 2016/12/13]
7. Aitken GR, Roderick PJ, Fraser S, et al. Change in prevalence of chronic kidney disease in England over time: comparison of nationally representative cross-sectional surveys from 2003 to 2010. *BMJ Open* 2014;4(9):e005480. doi: 10.1136/bmjopen-2014-005480 [published Online First: 2014/10/02]
8. Fraser SD, Roderick PJ, Aitken G, et al. Chronic kidney disease, albuminuria and socioeconomic status in the Health Surveys for England 2009 and 2010. *Journal of Public Health* 2013;36(4):577-86. doi: doi:10.1093/pubmed/fdt117
9. Thompson S, James M, Wiebe N, et al. Cause of Death in Patients with Reduced Kidney Function. *J Am Soc Nephrol* 2015;26(10):2504-11. doi: 10.1681/asn.2014070714 [published Online First: 2015/03/04]
10. Poblete Badal H. XXXVII Cuenta de Hemodiálisis Crónica (HDC) en Chile. Registro de Diálisis. [www.nefro.cl](http://www.nefro.cl): Sociedad Chilena de Nefrología, 2017.
11. United States Renal Data System. Volume 2 - End-stage Renal Disease (ESRD) in the United States 2017 [Available from: <https://www.usrds.org/2017/view/Default.aspx> accessed January 2018.
12. Instituto de Salud Pública. Registro Nacional de Trasplante 2017 [www.ispch.cl2017](http://www.ispch.cl2017) [cited 2018 September]. Available from: <http://www.ispch.cl/sites/default/files/Registro%20Nacional%202017.pdf> accessed January 2020.
13. Murphy D, McCulloch CE, Lin F, et al. Trends in Prevalence of Chronic Kidney Disease in the United States. *Ann Intern Med* 2016;165(7):473-81. doi: 10.7326/m16-0273 [published Online First: 2016/08/02]
14. MINSAL. ENS - Encuesta nacional de salud <http://epi.minsal.cl/encuesta-ens-descargable/>: Ministerio Nacional de Salud; 2019 [Available from: <http://epi.minsal.cl/encuesta-ens-descargable/2019>.
15. MINSAL. Encuesta Nacional de Salud ENS Chile 2009-2010: Ministerio de Salud de Chile; 2010 [Available from: <http://web.minsal.cl/portal/url/item/bcb03d7bc28b64dfe040010165012d23.pdf> accessed May 2016 2016.
16. MINSAL. Enfoque de Riesgo para la Prevención de Enfermedades Cardiovasculares. In: Subsecretaría de Salud Pública DdEnT, ed. [www.redcrónicas.cl](http://www.redcrónicas.cl), 2014.

17. McQueen RB, Farahbakhshian S, Bell KF, et al. Economic burden of comorbid chronic kidney disease and diabetes. *J Med Econ* 2017;20(6):585-91. doi: 10.1080/13696998.2017.1288127 [published Online First: 2017/01/28]
  18. Vupputuri S, Kimes TM, Calloway MO, et al. The economic burden of progressive chronic kidney disease among patients with type 2 diabetes. *J Diabetes Complications* 2014;28(1):10-6. doi: 10.1016/j.jdiacomp.2013.09.014 [published Online First: 2013/11/12]
  19. Mindell JS, Moody A, Vecino-Ortiz AI, et al. Comparison of Health Examination Survey Methods in Brazil, Chile, Colombia, Mexico, England, Scotland, and the United States. *Am J Epidemiol* 2017;186(6):648-58. doi: 10.1093/aje/kwx045 [published Online First: 2017/05/10]
  20. Levey AS, Inker LA, Coresh J. GFR estimation: from physiology to public health. *Am J Kidney Dis* 2014;63(5):820-34. doi: 10.1053/j.ajkd.2013.12.006 [published Online First: 2014/02/04]
  21. Uehara K, Tominaga N, Shibagaki Y. Adult orthostatic proteinuria. *Clin Kidney J* 2014;7(3):327-8. doi: 10.1093/ckj/sfu040 [published Online First: 2015/04/09]
  22. Fraser SD, Aitken G, Taal MW, et al. Exploration of Chronic Kidney Disease Prevalence Estimates Using New Measures of Kidney Function in the Health Survey for England. *Plus One* 2015:1-16. doi: 10.1371/journal.pone.0118676
  23. Weir CB, Jan A. BMI Classification Percentile And Cut Off Points. StatPearls. Treasure Island (FL): StatPearls Publishing
- Copyright © 2020, StatPearls Publishing LLC. 2020.
24. Coresh J, Selvin E, Stevens LA, et al. Prevalence of chronic kidney disease in the United States. *Jama* 2007;298(17):2038-47. doi: 10.1001/jama.298.17.2038 [published Online First: 2007/11/08]
  25. Ramirez-Rubio O, McClean MD, Amador JJ, et al. An epidemic of chronic kidney disease in Central America: an overview. *J Epidemiol Community Health*. England2013:1-3.
  26. Hu JR, Coresh J. The public health dimension of chronic kidney disease: what we have learnt over the past decade. *Nephrol Dial Transplant* 2017;32(suppl\_2):ii113-ii20. doi: 10.1093/ndt/gfw416 [published Online First: 2017/02/17]
  27. Qin X, Wang Y, Li Y, et al. Risk factors for renal function decline in adults with normal kidney function: a 7-year cohort study. *J Epidemiol Community Health* 2015;69(8):782-8. doi: 10.1136/jech-2014-204962 [published Online First: 2015/02/28]
  28. Tsai WC, Wu HY, Peng YS, et al. Risk Factors for Development and Progression of Chronic Kidney Disease: A Systematic Review and Exploratory Meta-Analysis. *Medicine (Baltimore)* 2016;95(11):e3013. doi: 10.1097/md.0000000000003013 [published Online First: 2016/03/18]
  29. Fox CS, Matsushita K, Woodward M, et al. Associations of kidney disease measures with mortality and end-stage renal disease in individuals with and without diabetes: a meta-analysis. *Lancet* 2012;380(9854):1662-73. doi: 10.1016/s0140-6736(12)61350-6 [published Online First: 2012/09/28]
  30. Chini LSN, Assis LIS, Lugon JR. Relationship between uric acid levels and risk of chronic kidney disease in a retrospective cohort of Brazilian workers. *Brazilian Journal of Medical & Biological Research* 2017;50(9):e6048. doi: <https://dx.doi.org/10.1590/1414-431X20176048>
  31. Yepes Delgado CE, Perez Davila S, Montoya Jaramillo M, et al. Stage progression and need for renal replacement therapy in a renal protection programme in Colombia. A cohort study. *Nefrologia* 2017;37(3):330-37. doi: <https://dx.doi.org/10.1016/j.nefro.2016.11.023>
  32. Cardoso CRL, Leite NC, Salles GC, et al. Aortic stiffness and ambulatory blood pressure as predictors of diabetic kidney disease: a competing risks analysis from the Rio de Janeiro Type 2 Diabetes Cohort Study. *Diabetologia* 2018;61(2):455-65. doi: <http://dx.doi.org/10.1007/s00125-017-4484-z>
  33. Nicholas SB, Kalantar-Zadeh K, Norris KC. Socioeconomic disparities in chronic kidney disease. *Adv Chronic Kidney Dis* 2015;22(1):6-15. doi: 10.1053/j.ackd.2014.07.002 [published Online First: 2015/01/13]

- 1  
2  
3 34. Vart P, Gansevoort RT, Joosten MM, et al. Socioeconomic disparities in chronic kidney disease: a  
4 systematic review and meta-analysis. *Am J Prev Med* 2015;48(5):580-92. doi:  
5 10.1016/j.amepre.2014.11.004 [published Online First: 2015/04/22]  
6  
7 35. The World Bank. GINI index (World Bank estimate) - Chile <https://data.worldbank.org>: The World  
8 Bank; 2017 [Available from:  
9 <https://data.worldbank.org/indicator/SI.POV.GINI?end=2015&locations=CL&start=1987&view=chart>  
10 accessed December 2017.  
11  
12 36. Riumallo-Herl CJ, Kawachi I, Avendano M. Social capital, mental health and biomarkers in Chile:  
13 assessing the effects of social capital in a middle-income country. *Soc Sci Med* 2014;105:47-  
14 58. doi: 10.1016/j.socscimed.2013.12.018 [published Online First: 2014/02/06]  
15  
16 37. Matsushita K, van der Velde M, Astor BC, et al. Association of estimated glomerular filtration rate  
17 and albuminuria with all-cause and cardiovascular mortality in general population cohorts: a  
18 collaborative meta-analysis. *Lancet* 2010;375(9731):2073-81. doi: 10.1016/s0140-  
19 6736(10)60674-5 [published Online First: 2010/05/21]  
20  
21 38. Luis-Lima S, Porrini E. An Overview of Errors and Flaws of Estimated GFR versus True GFR in  
22 Patients with Diabetes Mellitus. *Nephron* 2017;136(4):287-91. doi: 10.1159/000453531  
23 [published Online First: 2016/12/16]  
24  
25 39. Porrini E, Ruggenenti P, Luis-Lima S, et al. Estimated GFR: time for a critical appraisal. *Nat Rev*  
26 *Nephrol* 2019;15(3):177-90. doi: 10.1038/s41581-018-0080-9 [published Online First:  
27 2018/12/07]  
28  
29 40. Lemoine S, Guebre-Egziabher F, Sens F, et al. Accuracy of GFR estimation in obese patients. *Clin J*  
30 *Am Soc Nephrol* 2014;9(4):720-7. doi: 10.2215/cjn.03610413 [published Online First:  
31 2014/02/01]  
32  
33  
34  
35  
36  
37  
38  
39  
40  
41  
42  
43  
44  
45  
46  
47  
48  
49  
50  
51  
52  
53  
54  
55  
56  
57  
58  
59  
60

## Legends for Figures:

### Figure 1

Mean age (95% CIs) by eGFR values for participants aged 18 years and over of ENS 2009-2010 and ENS 2016-2017. eGFR (measured in mL/min/1.73 m<sup>2</sup>) determined by CKD-EPI equation. Presence of reduced kidney function (CKD Stages G3a-G5) considered as eGFR <60 mL/min/1.73 m<sup>2</sup>. Categories based on definition by KDIGO.<sup>5</sup>

### Figure 2

**A.** Association between demographics, health behaviours, comorbid conditions and survey year and reduced kidney function (CKD Stages G3a-G5). Reference categories: age: 55-64 years; gender: male; educational level: <8 years; living in urban area; current smoker; survey year: 2009-2010. Estimate not shown for persons 18-54 due to the very low prevalence of reduced kidney function at younger ages. **B.** Association between demographics, health behaviours, comorbid conditions and survey year and increased albuminuria (A2-A3). Reference categories: age: 40-49 years old; gender: male; educational level: <8 years; living in urban area; BMI category: normal (18.5 - 25 kg/m<sup>2</sup>); survey-defined diabetes only; survey year: 2009-2010. Variables not significant at 5% level in individual models were dropped from the final model.

Figure 1. Mean age by eGFR values in the Chilean adults aged 18 years or over

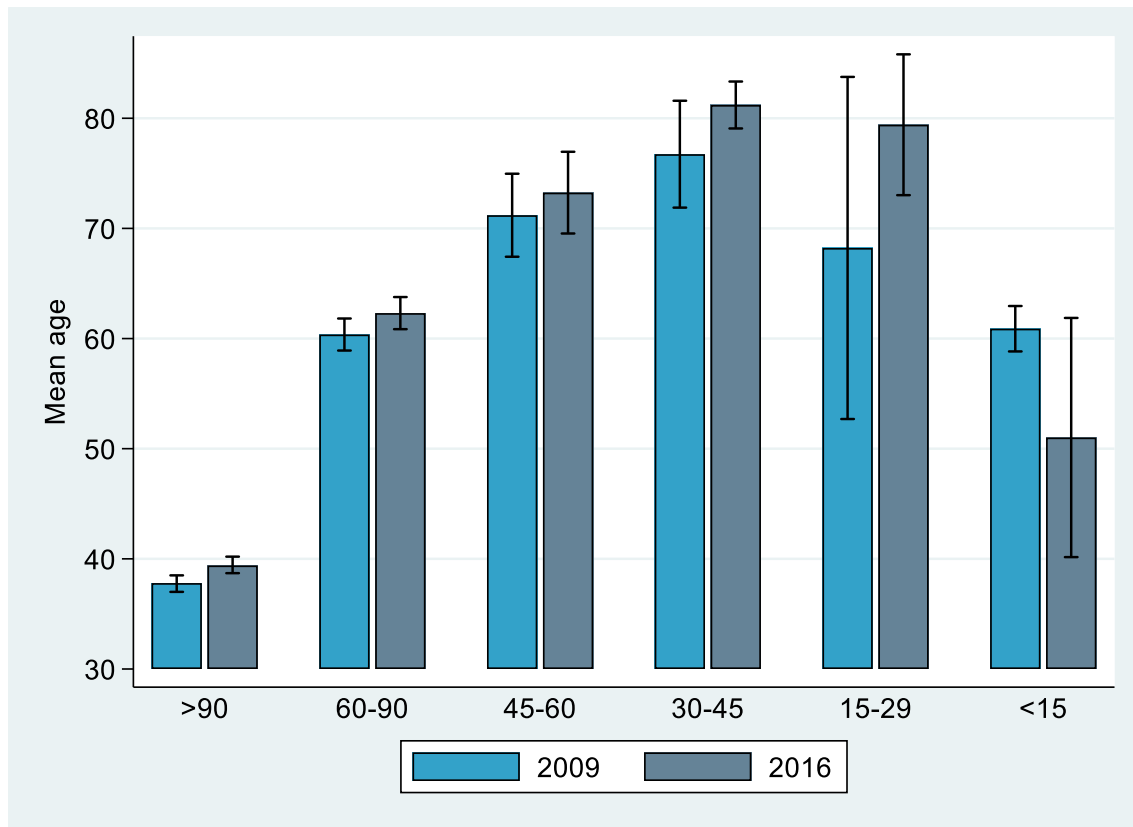

**Figure 2. Multivariable logistic regression model**

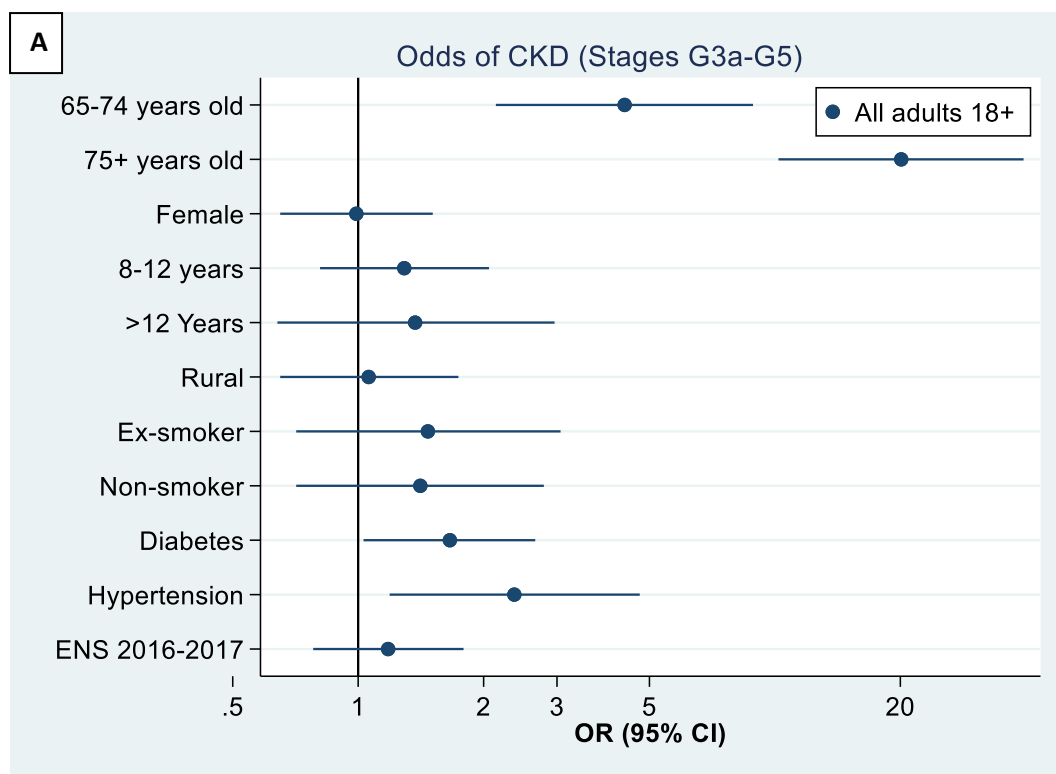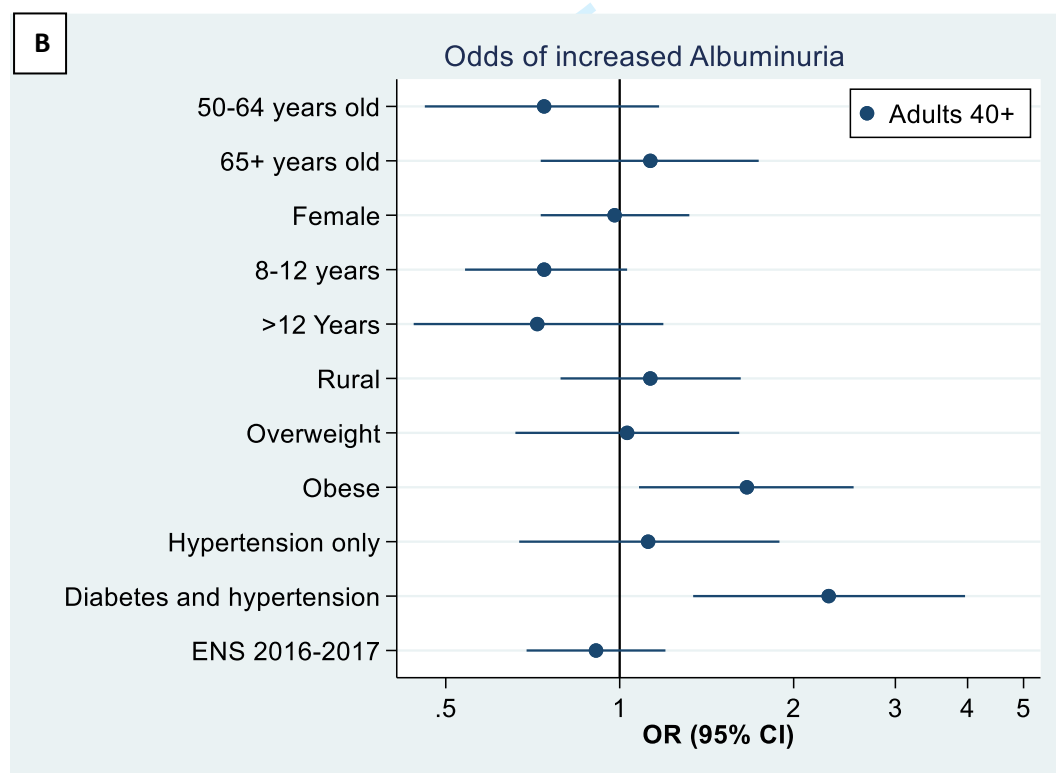

## Supplementary material

**Table S1.** Presence of CKD by GFR and Albuminuria categories according to KDIGO recommendations

| Presence of CKD by GFR and Albuminuria categories: KDIGO 2012       |     |                                  |       | Albuminuria categories: Description and range |                      |                    |
|---------------------------------------------------------------------|-----|----------------------------------|-------|-----------------------------------------------|----------------------|--------------------|
|                                                                     |     |                                  |       | A1                                            | A2                   | A3                 |
|                                                                     |     |                                  |       | Normal to mildly increased                    | Moderately increased | Severely increased |
|                                                                     |     |                                  |       | <30mg/g                                       | 30-300 mg/g          | >300 mg/g          |
| GFR categories (mL/min/1.73 m <sup>2</sup> ): Description and range | G1  | Normal or high                   | ≥90   |                                               |                      |                    |
|                                                                     | G2  | Mildly decreased                 | 60-89 |                                               |                      |                    |
|                                                                     | G3a | Mildly to moderately decreased   | 45-59 |                                               |                      |                    |
|                                                                     | G3b | Moderately to severely decreased | 30-44 |                                               |                      |                    |
|                                                                     | G4  | Severely decreased               | 15-29 |                                               |                      |                    |
|                                                                     | G5  | Kidney failure                   | <15   |                                               |                      |                    |

*Abbreviations:* CKD: chronic kidney disease; GFR: glomerular filtration rate; KDIGO: Kidney Disease - Improving Global Outcomes.

*Notes:* Cells in dark grey shading indicate CKD Stages G3a-G5: eGFR <60 mL/min/1.73 m<sup>2</sup>; cells in medium grey shading indicate CKD Stages 1-2: moderately to severely increased albuminuria but 'mildly decreased', 'normal', or 'high' kidney function (eGFR ≥60 mL/min/1.73 m<sup>2</sup>).

**Table S2. General characteristics of the sample<sup>a</sup>**

| Variable                         | ENS 2009-2010<br>Percentage (%) | ENS 2016-2017<br>Percentage (%) | P value<br>(ENS 2009-2010 vs<br>ENS 2016-2017) |
|----------------------------------|---------------------------------|---------------------------------|------------------------------------------------|
| N                                | 4583                            | 5995                            |                                                |
| Age (years: Mean<br>( $\pm$ SD)) | 43.1 ( $\pm$ 0.42)              | 5.1 ( $\pm$ 0.45)               | <0.01                                          |
| Sex                              |                                 |                                 | 0.73                                           |
| Female                           | 51.9%                           | 51.1%                           |                                                |
| Male                             | 48.1%                           | 48.9%                           |                                                |
| <i>Educational level</i>         |                                 |                                 | 0.13                                           |
| < 8 years                        | 19.2%                           | 17.5%                           |                                                |
| 8-12 years                       | 55.0%                           | 53.2%                           |                                                |
| >12 years                        | 25.8%                           | 29.3%                           |                                                |
| <i>Urban/Rural area</i>          |                                 |                                 | 0.17                                           |
| Urban                            | 87.1%                           | 89.0%                           |                                                |
| Rural                            | 12.9%                           | 11.0%                           |                                                |
| <i>Smoking behaviour</i>         |                                 |                                 | <0.01                                          |
| Current smoker                   | 41.8%                           | 33.4%                           |                                                |
| Ex-smoker                        | 23.1%                           | 27.1%                           |                                                |
| Non-smoker                       | 35.1%                           | 39.5%                           |                                                |
| <i>BMI<sup>b</sup></i>           |                                 |                                 | <0.01                                          |
| Underweight                      | 1.1%                            | 0.9%                            |                                                |
| Normal                           | 32.1%                           | 22.2%                           |                                                |
| Overweight                       | 40.8%                           | 40.9%                           |                                                |
| Obese                            | 26.0%                           | 36.1%                           |                                                |
| <i>Diabetes<sup>c</sup></i>      |                                 |                                 | <0.01                                          |
| No                               | 90.6%                           | 87.0%                           |                                                |
| Yes                              | 9.4%                            | 13.0%                           |                                                |
| <i>Hypertension<sup>d</sup></i>  |                                 |                                 | 0.40                                           |
| No                               | 72.3%                           | 70.4%                           |                                                |
| Yes                              | 27.7%                           | 29.6%                           |                                                |

<sup>a</sup> Adults 18 years and older. Adjusted for complex sample design, non-weighted for non-response.

<sup>b</sup> BMI: Body mass index. Underweight BMI <18.5 kg/m<sup>2</sup>; Normal: 18.5-24.9 kg/m<sup>2</sup>; Overweight: 25-29.9 kg/m<sup>2</sup>; Obese:  $\geq$ 30 kg/m<sup>2</sup>.

<sup>c</sup> Diabetes: Fasting blood glucose  $\geq$ 126 mg/dl or self-report of medical diagnosis of diabetes.

<sup>d</sup> Hypertension determined by SBP  $\geq$  140 mmHg and/or DBP  $\geq$  90 mmHg, or self-report of medical diagnosis of hypertension



**Table S3: Prevalence of CKD (based on eGFR values only) and mean age by eGFR Stages in the Chilean population 18 and older.**

| eGFR <sup>a</sup><br>(ml/min/1.73 m <sup>2</sup> ) | Prevalence<br>(95% CI) |                        | Mean Age<br>(95% CI)         |                              |
|----------------------------------------------------|------------------------|------------------------|------------------------------|------------------------------|
|                                                    | ENS 2009-2010          | ENS 2016-2017          | ENS 2009-<br>2010            | ENS 2016-<br>2017            |
| >90                                                | 77.6% (75.5,<br>79.6)  | 77.9% (75.9,<br>79.8)  | 37.8 (37.0,<br>38.5)         | 39.4 (38.7,<br>40.2)         |
| 60-90                                              | 19.9% (18.0,<br>21.9)  | 18.8% (17.1,<br>20.1)  | 60.4 (58.9,<br>61.8)         | 62.3 (60.9,<br>63.8)         |
| 45-59                                              | 1.6% (1.2, 2.3)        | 2.1% (1.6, 2.8)        | 71.2 (67.4,<br>75.0)         | 73.2 (69.5,<br>77.0)         |
| 30-44                                              | 0.5% (0.3, 0.8)        | 0.6% (0.4, 0.8)        | 76.7 (71.9,<br>81.6)         | 81.2 (79.1,<br>83.3)         |
| 15-29                                              | 0.2% (0.1, 0.5)        | 0.4% (0.2, 0.8)        | 68.2 (52.7,<br>83.8)         | 79.4 (73.0,<br>85.8)         |
| <15                                                | 0.1% (0.0, 0.4)        | 0.1% (0.1, 0.4)        | 60.9 (58.8,<br>63.0)         | 51.0 (40.2,<br>61.9)         |
| <b>Total CKD<sup>b</sup></b>                       | <b>2.5% (1.9, 3.2)</b> | <b>3.2% (2.6, 4.0)</b> | <b>71.8 (68.7,<br/>74.9)</b> | <b>74.4 (71.4,<br/>77.4)</b> |

<sup>a</sup> eGFR (measured in ml/min/1.73 m<sup>2</sup>) determined by CKD-EPI equation.

<sup>b</sup> CKD considered as eGFR <60 ml/min/1.73 m<sup>2</sup>. Categories based on definition by KDIGO.

**Table S4. Prevalence of albuminuria and mean age by ACR categories among participants aged 40+ with survey-defined diabetes and/or hypertension.**

| Albuminuria <sup>a</sup><br>(mg/g) | Prevalence<br>(95% CI)    |                           | Mean Age<br>(95% CI)     |                          |
|------------------------------------|---------------------------|---------------------------|--------------------------|--------------------------|
|                                    | ENS 2009-2010             | ENS 2016-2017             | ENS 2009-2010            | ENS 2016-2017            |
| <30                                | 81.7% (78.8, 84.0)        | 84.5% (82.2, 86.5)        | 57.8 (56.8, 58.7)        | 57.5 (56.7, 58.4)        |
| 30-300                             | 15.4% (13.0, 18.2)        | 13.5% (11.5, 15.7)        | 60.6 (58.5, 62.7)        | 63.6 (61.2, 66.1)        |
| >300                               | 2.9% (2.0, 4.3)           | 2.0% (1.5, 2.8)           | 59.0 (53.7, 64.4)        | 67.7 (63.4, 71.9)        |
| <b>Total increased albuminuria</b> | <b>18.3% (15.8, 21.2)</b> | <b>15.5% (13.5, 17.8)</b> | <b>60.4 (58.4, 62.3)</b> | <b>64.1 (61.9, 66.4)</b> |

<sup>a</sup> Albuminuria determined by the urine albumin-creatinine ratio. Normal: <30 mg/g; Moderately increased: 30-300 mg/g; Severely increased >300 mg/g.

STROBE Statement—Checklist of items that should be included in reports of *cross-sectional studies*

|                           | Item No | Recommendation                                                                                                                                                                       | This manuscript                                                                                                          |
|---------------------------|---------|--------------------------------------------------------------------------------------------------------------------------------------------------------------------------------------|--------------------------------------------------------------------------------------------------------------------------|
| <b>Title and abstract</b> | 1       | (a) Indicate the study's design with a commonly used term in the title or the abstract                                                                                               | The word 'surveys' in the title; 'cross-sectional' in the abstract                                                       |
|                           |         | (b) Provide in the abstract an informative and balanced summary of what was done and what was found                                                                                  | yes                                                                                                                      |
| <b>Introduction</b>       |         |                                                                                                                                                                                      |                                                                                                                          |
| Background/rationale      | 2       | Explain the scientific background and rationale for the investigation being reported                                                                                                 | yes                                                                                                                      |
| Objectives                | 3       | State specific objectives, including any prespecified hypotheses                                                                                                                     | Yes, N/A hypothesis                                                                                                      |
| <b>Methods</b>            |         |                                                                                                                                                                                      |                                                                                                                          |
| Study design              | 4       | Present key elements of study design early in the paper                                                                                                                              | yes                                                                                                                      |
| Setting                   | 5       | Describe the setting, locations, and relevant dates, including periods of recruitment, exposure, follow-up, and data collection                                                      | N/A, specifications of the health surveys were reported elsewhere and referenced.                                        |
| Participants              | 6       | (a) Give the eligibility criteria, and the sources and methods of selection of participants                                                                                          | Yes, more details of the health surveys were reported elsewhere and referenced                                           |
| Variables                 | 7       | Clearly define all outcomes, exposures, predictors, potential confounders, and effect modifiers. Give diagnostic criteria, if applicable                                             | yes                                                                                                                      |
| Data sources/measurement  | 8*      | For each variable of interest, give sources of data and details of methods of assessment (measurement). Describe comparability of assessment methods if there is more than one group | yes                                                                                                                      |
| Bias                      | 9       | Describe any efforts to address potential sources of bias                                                                                                                            | We excluded analyses of albuminuria of participants younger than 40 years old. This is explained in the methods section. |
| Study size                | 10      | Explain how the study size was arrived at                                                                                                                                            | yes                                                                                                                      |
| Quantitative variables    | 11      | Explain how quantitative variables were handled in the analyses. If applicable, describe which groupings were chosen and why                                                         | yes                                                                                                                      |
| Statistical methods       | 12      | (a) Describe all statistical methods,                                                                                                                                                | yes                                                                                                                      |

1  
2  
3  
4  
5  
6  
7  
8  
9  
10  
11  
12  
13  
14  
15  
16  
17  
18  
19  
20  
21  
22  
23  
24  
25  
26  
27  
28  
29  
30  
31  
32  
33  
34  
35  
36  
37  
38  
39  
40  
41  
42  
43  
44  
45  
46  
47  
48  
49  
50  
51  
52  
53  
54  
55  
56  
57  
58  
59  
60

including those used to control for confounding

(b) Describe any methods used to examine subgroups and interactions

yes

(c) Explain how missing data were addressed

yes

(d) If applicable, describe analytical methods taking account of sampling strategy

N/A

(e) Describe any sensitivity analyses

We conducted a number of regression analyses adjusting for different variables.

## Results

|                  |     |                                                                                                                                                                                                              |                                                          |
|------------------|-----|--------------------------------------------------------------------------------------------------------------------------------------------------------------------------------------------------------------|----------------------------------------------------------|
| Participants     | 13* | (a) Report numbers of individuals at each stage of study—eg numbers potentially eligible, examined for eligibility, confirmed eligible, included in the study, completing follow-up, and analysed            | yes                                                      |
|                  |     | (b) Give reasons for non-participation at each stage                                                                                                                                                         | N/A                                                      |
|                  |     | (c) Consider use of a flow diagram                                                                                                                                                                           | No                                                       |
| Descriptive data | 14* | (a) Give characteristics of study participants (eg demographic, clinical, social) and information on exposures and potential confounders                                                                     | Table S2                                                 |
|                  |     | (b) Indicate number of participants with missing data for each variable of interest                                                                                                                          | No, as missing data was very low for CKD population      |
| Outcome data     | 15* | Report numbers of outcome events or summary measures                                                                                                                                                         | N/A                                                      |
| Main results     | 16  | (a) Give unadjusted estimates and, if applicable, confounder-adjusted estimates and their precision (eg, 95% confidence interval). Make clear which confounders were adjusted for and why they were included | 95% CIs provided for variables and fully adjusted models |
|                  |     | (b) Report category boundaries when continuous variables were categorized                                                                                                                                    | yes                                                      |
|                  |     | (c) If relevant, consider translating estimates of relative risk into absolute risk for a meaningful time period                                                                                             | N/A                                                      |
| Other analyses   | 17  | Report other analyses done—eg analyses of subgroups and interactions, and sensitivity analyses                                                                                                               | yes                                                      |

## Discussion

|             |    |                                         |     |
|-------------|----|-----------------------------------------|-----|
| Key results | 18 | Summarise key results with reference to | yes |
|-------------|----|-----------------------------------------|-----|

| study objectives         |    |                                                                                                                                                                            |     |
|--------------------------|----|----------------------------------------------------------------------------------------------------------------------------------------------------------------------------|-----|
| Limitations              | 19 | Discuss limitations of the study, taking into account sources of potential bias or imprecision. Discuss both direction and magnitude of any potential bias                 | yes |
| Interpretation           | 20 | Give a cautious overall interpretation of results considering objectives, limitations, multiplicity of analyses, results from similar studies, and other relevant evidence | yes |
| Generalisability         | 21 | Discuss the generalisability (external validity) of the study results                                                                                                      | yes |
| <b>Other information</b> |    |                                                                                                                                                                            |     |
| Funding                  | 22 | Give the source of funding and the role of the funders for the present study and, if applicable, for the original study on which the present article is based              | yes |

\*Give information separately for exposed and unexposed groups.

**Note:** An Explanation and Elaboration article discusses each checklist item and gives methodological background and published examples of transparent reporting. The STROBE checklist is best used in conjunction with this article (freely available on the Web sites of PLoS Medicine at <http://www.plosmedicine.org/>, Annals of Internal Medicine at <http://www.annals.org/>, and Epidemiology at <http://www.epidem.com/>). Information on the STROBE Initiative is available at [www.strobe-statement.org](http://www.strobe-statement.org).
