# Supplementary material for: Chronic kidney disease in adults aged 18 years and older in Chile: findings from the cross-sectional Chilean National Health Surveys 2009–2010 and 2016–2017
Source: PubMed Central journal article supplement — BMJ Open. 2020 Sep 3;10(9):e037720. doi: 10.1136/bmjopen-2020-037720 (PMC7473630; doi:10.1136/bmjopen-2020-037720), 2020-09-03
Supplement: bmjopen-2020-037720supp001.pdf [file bmjopen-2020-037720supp001.pdf]

## Supplementary material

**Table S1.** Presence of CKD by GFR and Albuminuria categories according to KDIGO recommendations

| Presence of CKD by GFR and Albuminuria categories: KDIGO 2012          |     |                                  |       | Albuminuria categories: Description and range |                      |                    |
|------------------------------------------------------------------------|-----|----------------------------------|-------|-----------------------------------------------|----------------------|--------------------|
|                                                                        |     |                                  |       | A1                                            | A2                   | A3                 |
|                                                                        |     |                                  |       | Normal to mildly increased                    | Moderately increased | Severely increased |
|                                                                        |     |                                  |       | <30mg/g                                       | 30-300 mg/g          | >300 mg/g          |
| GFR categories (mL/min/1.73 m <sup>2</sup> ):<br>Description and range | G1  | Normal or high                   | ≥90   |                                               |                      |                    |
|                                                                        | G2  | Mildly decreased                 | 60-89 |                                               |                      |                    |
|                                                                        | G3a | Mildly to moderately decreased   | 45-59 |                                               |                      |                    |
|                                                                        | G3b | Moderately to severely decreased | 30-44 |                                               |                      |                    |
|                                                                        | G4  | Severely decreased               | 15-29 |                                               |                      |                    |
|                                                                        | G5  | Kidney failure                   | <15   |                                               |                      |                    |

*Abbreviations:* CKD: chronic kidney disease; GFR: glomerular filtration rate; KDIGO: Kidney Disease - Improving Global Outcomes.

*Notes:* Cells in dark grey shading indicate CKD Stages G3a-G5: eGFR <60 mL/min/1.73 m<sup>2</sup>; cells in medium grey shading indicate CKD Stages 1-2: moderately to severely increased albuminuria but 'mildly decreased', 'normal', or 'high' kidney function (eGFR ≥60 mL/min/1.73 m<sup>2</sup>).

**Table S2. General characteristics of the sample<sup>a</sup>**

| <b>Variable</b>                 | <b>ENS 2009-2010<br/>Percentage (%)</b> | <b>ENS 2016-2017<br/>Percentage (%)</b> | <b>P value<br/>(ENS 2009-2010 vs<br/>ENS 2016-2017)</b> |
|---------------------------------|-----------------------------------------|-----------------------------------------|---------------------------------------------------------|
| N                               | 4583                                    | 5995                                    |                                                         |
| Age (years: Mean (±SD))         | 43.1 (±0.42)                            | 5.1 (±0.45)                             | <0.01                                                   |
| Sex                             |                                         |                                         | 0.73                                                    |
| Female                          | 51.9%                                   | 51.1%                                   |                                                         |
| Male                            | 48.1%                                   | 48.9%                                   |                                                         |
| <i>Educational level</i>        |                                         |                                         | 0.13                                                    |
| < 8 years                       | 19.2%                                   | 17.5%                                   |                                                         |
| 8-12 years                      | 55.0%                                   | 53.2%                                   |                                                         |
| >12 years                       | 25.8%                                   | 29.3%                                   |                                                         |
| <i>Urban/Rural area</i>         |                                         |                                         | 0.17                                                    |
| Urban                           | 87.1%                                   | 89.0%                                   |                                                         |
| Rural                           | 12.9%                                   | 11.0%                                   |                                                         |
| <i>Smoking behaviour</i>        |                                         |                                         | <0.01                                                   |
| Current smoker                  | 41.8%                                   | 33.4%                                   |                                                         |
| Ex-smoker                       | 23.1%                                   | 27.1%                                   |                                                         |
| Non-smoker                      | 35.1%                                   | 39.5%                                   |                                                         |
| <i>BMI<sup>b</sup></i>          |                                         |                                         | <0.01                                                   |
| Underweight                     | 1.1%                                    | 0.9%                                    |                                                         |
| Normal                          | 32.1%                                   | 22.2%                                   |                                                         |
| Overweight                      | 40.8%                                   | 40.9%                                   |                                                         |
| Obese                           | 26.0%                                   | 36.1%                                   |                                                         |
| <i>Diabetes<sup>c</sup></i>     |                                         |                                         | <0.01                                                   |
| No                              | 90.6%                                   | 87.0%                                   |                                                         |
| Yes                             | 9.4%                                    | 13.0%                                   |                                                         |
| <i>Hypertension<sup>d</sup></i> |                                         |                                         | 0.40                                                    |
| No                              | 72.3%                                   | 70.4%                                   |                                                         |
| Yes                             | 27.7%                                   | 29.6%                                   |                                                         |

<sup>a</sup> Adults 18 years and older. Adjusted for complex sample design, non-weighted for non-response.

<sup>b</sup> BMI: Body mass index. Underweight BMI <18.5 kg/m<sup>2</sup>; Normal: 18.5-24.9 kg/m<sup>2</sup>; Overweight: 25-29.9 kg/m<sup>2</sup>; Obese: ≥30 kg/m<sup>2</sup>.

<sup>c</sup> Diabetes: Fasting blood glucose ≥126 mg/dl or self-report of medical diagnosis of diabetes.

<sup>d</sup> Hypertension determined by SBP ≥ 140 mmHg and/or DBP ≥ 90 mmHg, or self-report of medical diagnosis of hypertension

**Table S3: Prevalence of CKD (based on eGFR values only) and mean age by eGFR Stages in the Chilean population 18 and older.**

| eGFR <sup>a</sup><br>(ml/min/1.73 m <sup>2</sup> ) | Prevalence<br>(95% CI) |                        | Mean Age<br>(95% CI)     |                          |
|----------------------------------------------------|------------------------|------------------------|--------------------------|--------------------------|
|                                                    | ENS 2009-2010          | ENS 2016-2017          | ENS 2009-2010            | ENS 2016-2017            |
| >90                                                | 77.6% (75.5, 79.6)     | 77.9% (75.9, 79.8)     | 37.8 (37.0, 38.5)        | 39.4 (38.7, 40.2)        |
| 60-90                                              | 19.9% (18.0, 21.9)     | 18.8% (17.1, 20.1)     | 60.4 (58.9, 61.8)        | 62.3 (60.9, 63.8)        |
| 45-59                                              | 1.6% (1.2, 2.3)        | 2.1% (1.6, 2.8)        | 71.2 (67.4, 75.0)        | 73.2 (69.5, 77.0)        |
| 30-44                                              | 0.5% (0.3, 0.8)        | 0.6% (0.4, 0.8)        | 76.7 (71.9, 81.6)        | 81.2 (79.1, 83.3)        |
| 15-29                                              | 0.2% (0.1, 0.5)        | 0.4% (0.2, 0.8)        | 68.2 (52.7, 83.8)        | 79.4 (73.0, 85.8)        |
| <15                                                | 0.1% (0.0, 0.4)        | 0.1% (0.1, 0.4)        | 60.9 (58.8, 63.0)        | 51.0 (40.2, 61.9)        |
| <b>Total CKD<sup>b</sup></b>                       | <b>2.5% (1.9, 3.2)</b> | <b>3.2% (2.6, 4.0)</b> | <b>71.8 (68.7, 74.9)</b> | <b>74.4 (71.4, 77.4)</b> |

<sup>a</sup> eGFR (measured in ml/min/1.73 m<sup>2</sup>) determined by CKD-EPI equation.

<sup>b</sup> CKD considered as eGFR <60 ml/min/1.73 m<sup>2</sup>. Categories based on definition by KDIGO.

**Table S4. Prevalence of albuminuria and mean age by ACR categories among participants aged 40+ with survey-defined diabetes and/or hypertension.**

| Albuminuria <sup>a</sup><br>(mg/g) | Prevalence<br>(95% CI)    |                           | Mean Age<br>(95% CI)     |                          |
|------------------------------------|---------------------------|---------------------------|--------------------------|--------------------------|
|                                    | ENS 2009-2010             | ENS 2016-2017             | ENS 2009-2010            | ENS 2016-2017            |
| <30                                | 81.7% (78.8, 84.0)        | 84.5% (82.2, 86.5)        | 57.8 (56.8, 58.7)        | 57.5 (56.7, 58.4)        |
| 30-300                             | 15.4% (13.0, 18.2)        | 13.5% (11.5, 15.7)        | 60.6 (58.5, 62.7)        | 63.6 (61.2, 66.1)        |
| >300                               | 2.9% (2.0, 4.3)           | 2.0% (1.5, 2.8)           | 59.0 (53.7, 64.4)        | 67.7 (63.4, 71.9)        |
| <b>Total increased albuminuria</b> | <b>18.3% (15.8, 21.2)</b> | <b>15.5% (13.5, 17.8)</b> | <b>60.4 (58.4, 62.3)</b> | <b>64.1 (61.9, 66.4)</b> |

<sup>a</sup> Albuminuria determined by the urine albumin-creatinine ratio. Normal: <30 mg/g; Moderately increased: 30-300 mg/g; Severely increased >300 mg/g.
